# Supplementary material for: Epistatic selection on a selfish Segregation Distorter supergene – drive, recombination, and genetic load
Source: eLife journal article supplement (doi:10.7554/elife.78981), 2022-04-29

**A. Chromosome arm 2R uninverted**

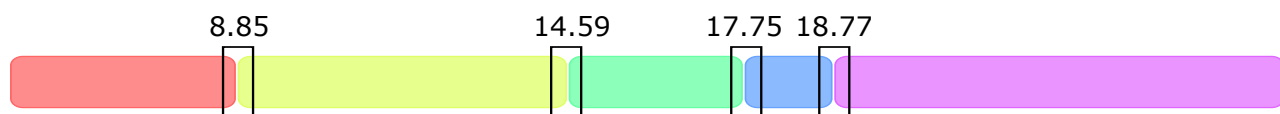

**B. Possible rearrangements of syntenic blocks**

**B1. Distal first, proximal second**

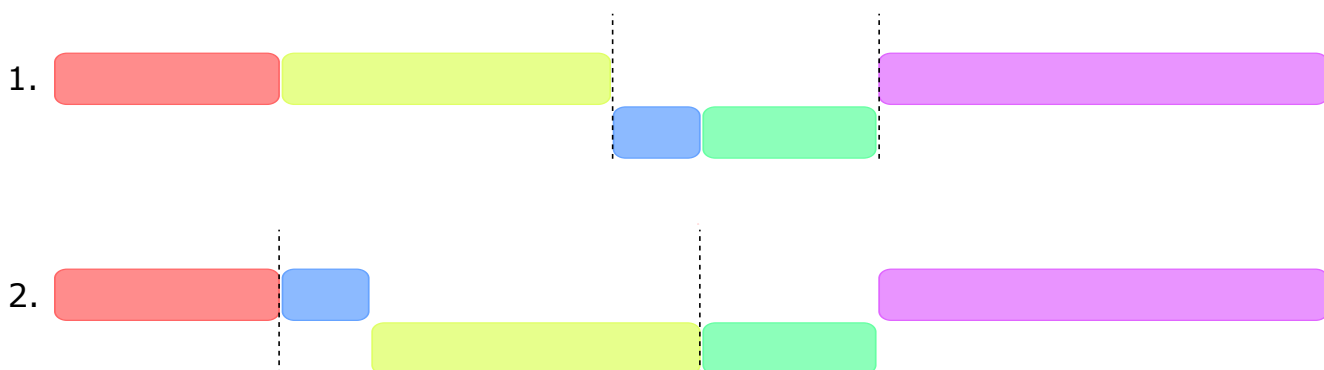

**B2. Proximal first, distal second**

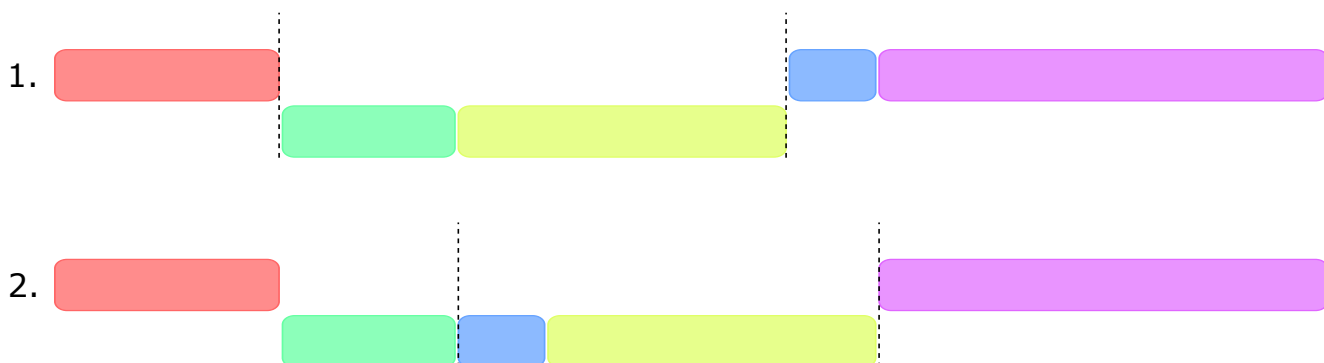

**B3. Whole region first, then distal**

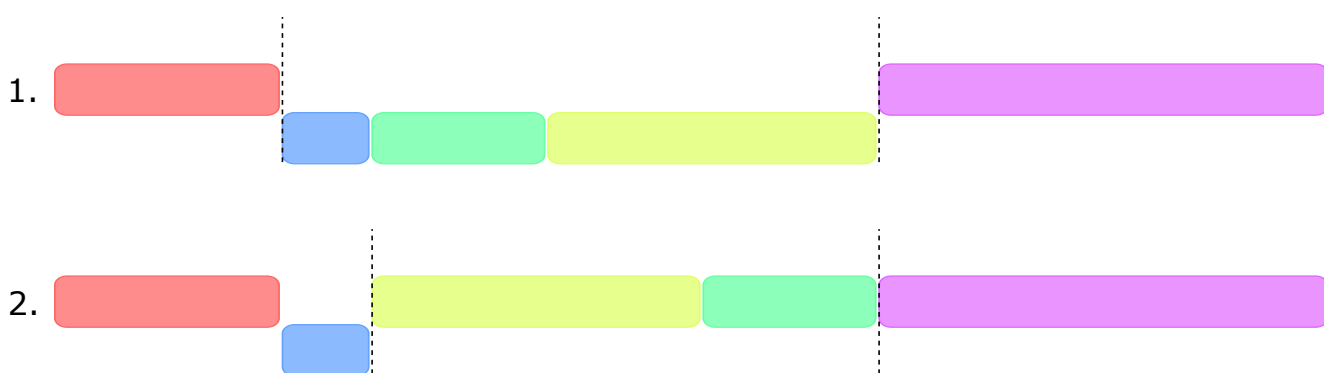

**B4. Whole region first, then proximal**

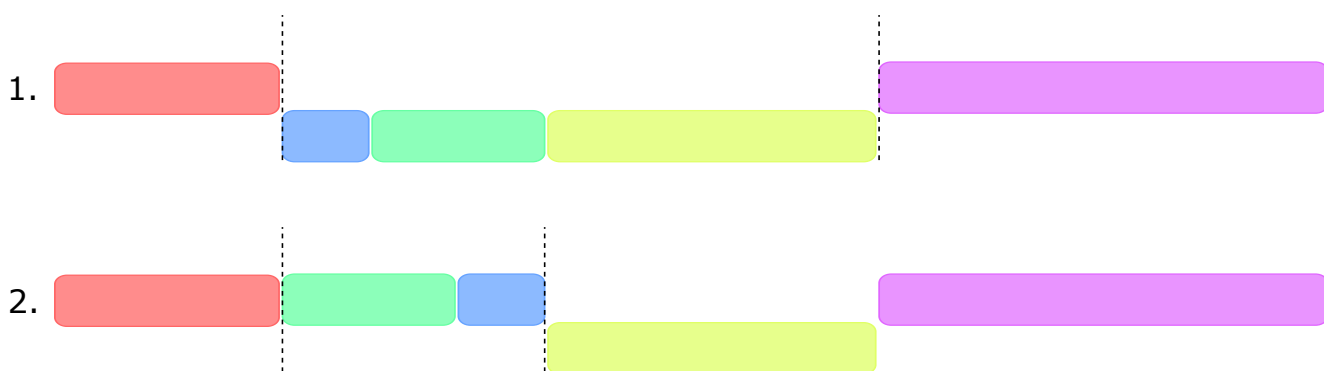

Supplement: supp [file elife-78981-supp-v1.zip]
