# Supplementary material for: Epistatic selection on a selfish Segregation Distorter supergene – drive, recombination, and genetic load
Source: eLife. 2022 Apr 29;11:e78981. doi: 10.7554/eLife.78981 (PMC9122502; doi:10.7554/eLife.78981)
Supplement: Supplementary file 1. — List of NCBI SRA accession numbers, genotype, number of reads, and estimated coverage for each line (Sheet 1). Per-chromosome depth of the SD-Mal lines sequenced in this paper (Sheet 2). [file elife-78981-supp1.xls]

## Sheet: Sheet1
								Genome size (nucl)	143725995
	Line	NCBI Acc.No.	Genotype	Total Reads	Mapped Reads	%mapped	Read Length	Median Insert Size	Coverage	Coverage (mapped)
	SD-ZI125	SRR12356031	Sd,In(2R)Mal	89052088	88441654	99.3145	98	406	60.7204	60.3042
	SD-ZI138	SRR12356030	Sd,In(2R)Mal	101215654	100655400	99.4465	98	402	69.0142	68.6322
	SD-ZI157	SRR12356029	Sd,In(2R)NS*	54831485	54368588	99.1558	98	420	37.387	37.0714
	SD-ZI233	SRR12356028	Sd,In(2R)Mal	80244488	75871246	94.5501	98	402	54.7149	51.733
	SD-ZI259	SRR12356027	Sd,In(2R)Mal	87535512	80827480	92.3368	99	408	60.2954	55.6748
	SD-ZI323	SRR12356026	Sd,In(2R)Mal	78245387	77525742	99.0803	98	401	53.3519	52.8612
	SD-ZI348	SRR12356025	Sd,In(2R)Mal	69410978	68859253	99.2051	99	403	47.811	47.431
	SD-ZI469	SRR12356024	Sd,In(2R)Mal	92573942	91927211	99.3014	98	411	63.1218	62.6808
	SD-ZI509	SRR12356023	Sd,In(2R)Mal	87303904	86692564	99.2998	98	410	59.5284	59.1116
	SD-ZI838	SRR12356022	Sd,In(2R)Mal	84562716	83903866	99.2209	98	412	57.6593	57.2101
	ZI114N	SRR654662	Sd+,In(2L)t	50386686	49137783	97.5214	158	443	55.3908	54.0179	Lack et al. 2015
	ZI117	SRR248130	Sd+,In(2L)t	33936204	33764978	99.4954	146	366	34.4731	34.2992	Lack et al. 2015
	ZI118N	SRR654664	Sd+,In(2L)t	34485035	33715913	97.7697	158	337	37.9099	37.0644	Lack et al. 2015
	ZI161	SRR353759	Sd+,In(2L)t	38977561	38721493	99.343	158	383	42.8486	42.5671	Lack et al. 2015
	ZI179	SRR203233	Sd+,In(2R)NS	34868031	34402155	98.6639	146	367	35.4197	34.9465	Lack et al. 2015
	ZI182	SRR203473	Sd+,In(2R)NS	41068703	40813906	99.3796	146	450	41.7185	41.4597	Lack et al. 2015
	ZI198	SRR203230	Sd+,In(2L)t	34272004	33909692	98.9428	146	404	34.8142	34.4462	Lack et al. 2015
	ZI206	SRR203506	Sd+,In(2L)t	39363160	38980782	99.0286	146	348	39.986	39.5975	Lack et al. 2015
	ZI216N	SRR203328	Sd+,In(2R)NS	41373062	40238320	97.2573	146	330	42.0277	40.875	Lack et al. 2015
	ZI226	SRR203348	Sd+,In(2R)NS	38737919	38537299	99.4821	146	364	39.3508	39.147	Lack et al. 2015
	ZI227	SRR202126	Sd+,In(2L)t	52280448	51338581	98.1984	146	359	53.1076	52.1509	Lack et al. 2015
	ZI240	SRR203324	Sd+,In(2L)t	38228826	37966017	99.3125	146	387	38.8337	38.5667	Lack et al. 2015
	ZI253	SRR203350	Sd+,In(2L)t	41105469	40844136	99.3642	146	321	41.7558	41.4904	Lack et al. 2015
	ZI255	SRR210784	Sd+,In(2R)NS	40463726	39922137	98.6615	146	412	41.1039	40.5538	Lack et al. 2015
	ZI295	SRR202099	Sd+,In(2R)NS	40627089	40146261	98.8165	146	354	41.2699	40.7814	Lack et al. 2015
	ZI364	SRR204013	Sd+,In(2R)NS	39031072	38765493	99.3196	146	309	39.6486	39.3788	Lack et al. 2015
	ZI374	SRR204008	Sd+,In(2L)t	43090345	42315271	98.2013	146	329	43.7721	42.9848	Lack et al. 2015
	ZI448	SRR210790	Sd+,In(2R)NS	37913796	37592370	99.1522	146	384	38.5137	38.1871	Lack et al. 2015
	ZI466	SRR202080	Sd+,In(2R)NS	30839057	29751213	96.4725	146	362	31.327	30.2219	Lack et al. 2015
	ZI56	SRR346931	Sd+,In(2R)NS	36877392	36581515	99.1977	158	358	40.5398	40.2146	Lack et al. 2015
			* Non-driver

## Sheet: Sheet2
		Mapped Reads								Coverage (mapped reads * read lenght/chromosome length)
NCBI Acc.No.	Genotype	2L	2R	3L	3R	4	X	Y	mitochondrial	2L	2R	3L	3R	4	X	Y	mitochondrial
SRR12356031	Sd,In(2R)Mal	14497206	14451165	18019372	17993187	1006377	16700796	333692	3998354	60.4212	56.0058	62.8205	54.9679	73.1568	69.5208	8.91701	20076.8
SRR12356030	Sd,In(2R)Mal	1603739	1377793	1873227	2078738	77169	1504438	21418	91987419	6.68403	5.33966	6.53059	6.35039	5.60966	6.26256	0.572338	461893
SRR12356029	Sd,In(2R)NS*	8715024	9185233	10143060	11441502	552952	8899572	294607	848119	36.3223	35.5975	35.3615	34.9529	40.1959	37.0465	7.87257	4258.63
SRR12356028	Sd,In(2R)Mal	12939105	13087486	14815146	17327397	527172	16227057	197004	46485	53.9274	50.7208	51.6497	52.9339	38.3218	67.5488	5.2644	233.413
SRR12356027	Sd,In(2R)Mal	13394114	12671253	15267196	16926210	658368	13753388	202766	6297578	56.3934	49.6088	53.7688	52.236	48.3473	57.8358	5.47366	31944.5
SRR12356026	Sd,In(2R)Mal	13610875	13344537	16207257	17233934	798429	14365065	239666	399769	56.7271	51.717	56.503	52.6484	58.0404	59.7978	6.40442	2007.35
SRR12356025	Sd,In(2R)Mal	11074016	11825106	14381651	14725369	593477	14353489	303830	72791	46.625	46.2961	50.65	45.444	43.582	60.3593	8.20188	369.232
SRR12356024	Sd,In(2R)Mal	16649620	14923824	19849103	20663252	967584	16052473	282728	859914	69.392	57.8376	69.1994	63.1247	70.3368	66.822	7.55514	4317.85
SRR12356023	Sd,In(2R)Mal	15451629	15193771	18084727	19565102	888206	15160777	260931	705749	64.399	58.8837	63.0483	59.7699	64.5666	63.1101	6.97267	3543.75
SRR12356022	Sd,In(2R)Mal	15037463	13472583	18380119	18554548	1124739	15301028	349487	200318	62.6729	52.2133	64.0782	56.6828	81.7609	63.694	9.33909	1005.85
	Chromosome sizes	23513712	25286936	28110227	32079331	1348131	23542271	3667352	19517
	* Non-driver
