# Supplementary material for: Epistatic selection on a selfish Segregation Distorter supergene – drive, recombination, and genetic load
Source: eLife. 2022 Apr 29;11:e78981. doi: 10.7554/eLife.78981 (PMC9122502; doi:10.7554/eLife.78981)
Supplement: Supplementary file 2. — Genotypes (where BL156 or SD means consistent with either of those parental alleles): Sd (2L:19.44); inferred from visible markers and double checked with primers in Presgraves et al., 2009; In(2R)Mal distal breakpoint (2R:18.77; inferred from visible markers and double checked with primers in Supplementary file 4), sano (2R:18.87; inferred from molecular markers, primers in the Materials and methods section); CG15666 (2R:21.34; inferred from molecular markers, primers in the Materials and methods section) and px (2R:22.49; inferred from visible markers). [file elife-78981-supp2.xlsx]

## Sheet: Suppl.Table_MolMarkers
cross.number	bcpx, females	bcpx, males	++px, females	++px, males	n	k	w	k*	Sd (2L: 19.44)	In(2R)Mal (18.77)	sano (2R:18.87)	CG15666 (2R:21.34)	px (2R: 22.49)
83	0	0	123	157	280	1	1.54545	1	Sd	SD	BL156	BL156	BL156
70	0	1	79	90	170	0.994118	1.54545	0.990938	Sd	SD	BL156	BL156	BL156
88	0	0	5	10	15	1	1.54545	1	Sd	SD	SD	BL156	BL156
87	0	0	82	70	152	1	1.54545	1	Sd	SD	SD	BL156	BL156
85	2	0	74	69	145	0.986207	1.54545	0.978843	Sd	SD	SD	BL156	BL156
84	9	2	83	83	177	0.937853	1.54545	0.907104	Sd	SD	SD	BL156	BL156
82	0	0	75	73	148	1	1.54545	1	Sd	SD	SD	BL156	BL156
77	0	0	63	71	134	1	1.54545	1	Sd	SD	SD	BL156	BL156
75	12	6	37	35	90	0.8	1.54545	0.721311	Sd	SD	SD	BL156	BL156
74	0	0	12	21	33	1	1.54545	1	Sd	SD	SD	BL156	BL156
71	0	0	24	33	57	1	1.54545	1	Sd	SD	SD	BL156	BL156
69	20	12	82	88	202	0.841584	1.54545	0.774648	Sd	SD	SD	BL156	BL156
63	15	9	127	139	290	0.917241	1.54545	0.877624	Sd	SD	SD	BL156	BL156
60	3	3	115	84	205	0.970732	1.54545	0.955478	Sd	SD	SD	BL156	BL156
59	0	0	30	47	77	1	1.54545	1	Sd	SD	SD	BL156	BL156
56	0	1	37	51	89	0.988764	1.54545	0.982741	Sd	SD	SD	BL156	BL156
55	0	1	7	3	11	0.909091	1.54545	0.866142	Sd	SD	SD	BL156	BL156
54	2	3	26	32	63	0.920635	1.54545	0.882434	Sd	SD	SD	BL156	BL156
52	2	0	81	83	166	0.987952	1.54545	0.981502	Sd	SD	SD	BL156	BL156
51	0	2	75	75	152	0.986842	1.54545	0.97981	Sd	SD	SD	BL156	BL156
50	2	0	99	116	217	0.990783	1.54545	0.985827	Sd	SD	SD	BL156	BL156
49	1	2	33	33	69	0.956522	1.54545	0.934363	Sd	SD	SD	BL156	BL156
47	0	0	27	27	54	1	1.54545	1	Sd	SD	SD	BL156	BL156
44	0	5	20	33	58	0.913793	1.54545	0.872754	Sd	SD	SD	BL156	BL156
43	8	9	50	75	142	0.880282	1.54545	0.826322	Sd	SD	SD	BL156	BL156
38	3	1	46	56	106	0.962264	1.54545	0.942857	Sd	SD	SD	BL156	BL156
37	0	0	19	27	46	1	1.54545	1	Sd	SD	SD	BL156	BL156
36	1	2	16	18	37	0.918919	1.54545	0.88	Sd	SD	SD	BL156	BL156
34	2	0	12	35	49	0.959184	1.54545	0.938294	Sd	SD	SD	BL156	BL156
30	0	0	22	18	40	1	1.54545	1	Sd	SD	SD	BL156	BL156
27	1	0	51	60	112	0.991071	1.54545	0.986268	Sd	SD	SD	BL156	BL156
26	0	1	31	31	63	0.984127	1.54545	0.97568	Sd	SD	SD	BL156	BL156
24	2	3	65	69	139	0.964029	1.54545	0.945478	Sd	SD	SD	BL156	BL156
19	1	1	97	110	209	0.990431	1.54545	0.985288	Sd	SD	SD	BL156	BL156
18	3	2	158	170	333	0.984985	1.54545	0.976983	Sd	SD	SD	BL156	BL156
15	0	0	14	18	32	1	1.54545	1	Sd	SD	SD	BL156	BL156
14	1	0	76	76	153	0.993464	1.54545	0.989935	Sd	SD	SD	BL156	BL156
11	1	3	83	74	161	0.975155	1.54545	0.962117	Sd	SD	SD	BL156	BL156
8	2	2	51	87	142	0.971831	1.54545	0.957125	Sd	SD	SD	BL156	BL156
7	0	0	86	86	172	1	1.54545	1	Sd	SD	SD	BL156	BL156
5	1	2	42	37	82	0.963415	1.54545	0.944565	Sd	SD	SD	BL156	BL156
3	0	0	55	95	150	1	1.54545	1	Sd	SD	SD	BL156	BL156
86	4	7	134	101	246	0.955285	1.54545	0.93254	Sd	SD	SD	SD	BL156
81	0	0	81	70	151	1	1.54545	1	Sd	SD	SD	SD	BL156
80	8	7	95	59	169	0.911243	1.54545	0.869164	Sd	SD	SD	SD	BL156
79	11	3	141	134	289	0.951557	1.54545	0.927061	Sd	SD	SD	SD	BL156
78	0	1	27	39	67	0.985075	1.54545	0.97712	Sd	SD	SD	SD	BL156
73	0	0	3	4	7	1	1.54545	1	Sd	SD	SD	SD	BL156
72	0	0	70	51	121	1	1.54545	1	Sd	SD	SD	SD	BL156
68	1	0	101	120	222	0.995495	1.54545	0.993056	Sd	SD	SD	SD	BL156
66	2	0	112	109	223	0.991031	1.54545	0.986207	Sd	SD	SD	SD	BL156
64	1	2	102	115	220	0.986364	1.54545	0.979081	Sd	SD	SD	SD	BL156
58	0	1	25	23	49	0.979592	1.54545	0.968807	Sd	SD	SD	SD	BL156
57	2	0	81	94	177	0.988701	1.54545	0.982644	Sd	SD	SD	SD	BL156
53	1	2	111	77	191	0.984293	1.54545	0.975932	Sd	SD	SD	SD	BL156
48	0	0	26	24	50	1	1.54545	1	Sd	SD	SD	SD	BL156
46	5	8	28	31	72	0.819444	1.54545	0.745977	Sd	SD	SD	SD	BL156
41	0	0	7	16	23	1	1.54545	1	Sd	SD	SD	SD	BL156
40	0	0	41	42	83	1	1.54545	1	Sd	SD	SD	SD	BL156
39	0	0	43	48	91	1	1.54545	1	Sd	SD	SD	SD	BL156
35	0	0	17	24	41	1	1.54545	1	Sd	SD	SD	SD	BL156
32	0	0	24	16	40	1	1.54545	1	Sd	SD	SD	SD	BL156
31	0	0	20	7	27	1	1.54545	1	Sd	SD	SD	SD	BL156
25	0	0	24	29	53	1	1.54545	1	Sd	SD	SD	SD	BL156
20	0	0	16	15	31	1	1.54545	1	Sd	SD	SD	SD	BL156
16	0	0	8	8	16	1	1.54545	1	Sd	SD	SD	SD	BL156
13	1	0	29	35	65	0.984615	1.54545	0.976422	Sd	SD	SD	SD	BL156
10	0	1	26	23	50	0.98	1.54545	0.969424	Sd	SD	SD	SD	BL156
6	7	4	69	77	157	0.929936	1.54545	0.895706	Sd	SD	SD	SD	BL156
4	1	1	128	102	232	0.991379	1.54545	0.986739	Sd	SD	SD	SD	BL156
1	0	0	2	3	5	1	1.54545	1	Sd	SD	SD	SD	BL156
										SD	69	29
										BL156	2	42
											71	71
