# Supplementary material for: Epistatic selection on a selfish Segregation Distorter supergene – drive, recombination, and genetic load
Source: eLife. 2022 Apr 29;11:e78981. doi: 10.7554/eLife.78981 (PMC9122502; doi:10.7554/eLife.78981)
Supplement: Supplementary file 3. [file elife-78981-supp3.xls]

## Sheet: Sheet1
Coords (dmel6)	Inversion	Lenght (Mb)	Npriv (perc)		Nshared (perc)		Npriv/Mb	Nshared/Mb
2R:885560..14591030	In(2R)Mal-p	5.7354	491	0.668937	554	0.818316	85.6087	96.5932
2R:14591034..17749309	In(2R)Mal-d	3.15831	200	0.27248	112	0.165436	63.3251	35.462
2R:17749310..18774475	Overlap (inverted twice)	1.02517	43	0.0585831	11	0.0162482	41.9445	10.73
			734		677
