# Supplementary material for: Epistatic selection on a selfish Segregation Distorter supergene – drive, recombination, and genetic load
Source: eLife. 2022 Apr 29;11:e78981. doi: 10.7554/eLife.78981 (PMC9122502; doi:10.7554/eLife.78981)
Supplement: Supplementary file 4. [file elife-78981-supp4.xls]

## Sheet: Sheet1
	F primer	Coord (BDGP 6)	R primer	Coord (BDGP 6)	Amplicon Size In(2R)Mal
In(2R)Mal, proximal	GCTTGTCCTGACCACTGTTG	2R:8855169	CCGTTCGGTGAGAACTTCA	2R:17749706	839 bp
In(2R)Mal, distal	CTCCGTACCGCACAGAAGTT	2R:18774399	ACAAAACCAAACTGCGAACC	2R:14590910	580 bp
