# Supplementary material for: Epistatic selection on a selfish Segregation Distorter supergene – drive, recombination, and genetic load
Source: eLife. 2022 Apr 29;11:e78981. doi: 10.7554/eLife.78981 (PMC9122502; doi:10.7554/eLife.78981)
Supplement: Supplementary file 5. [file elife-78981-supp5.xls]

## Sheet: Sheet1
					Inversion calls in DPGP3 dataset			Inversion calls in this paper
	Line	SRA accesion numbers	Used in this paper	Sd	In(2L)t	In(2R)NS	In(2R)Mal	In(2L)t	In(2R)NS	In(2R)Mal
1	SD-ZI348	SRR12356025	yes	Sd	NA	NA	NA	ST	ST	INV
2	SD-ZI125	SRR12356031	yes	Sd	NA	NA	NA	ST	ST	INV
3	SD-ZI233	SRR12356028	yes	Sd	NA	NA	NA	ST	ST	INV
4	SD-ZI259	SRR12356027	yes	Sd	NA	NA	NA	ST	ST	INV
5	SD-ZI323	SRR12356026	yes	Sd	NA	NA	NA	ST	ST	INV
6	SD-ZI469	SRR12356024	yes	Sd	NA	NA	NA	ST	ST	INV
7	SD-ZI509	SRR12356023	yes	Sd	NA	NA	NA	ST	ST	INV
8	SD-ZI838	SRR12356022	yes	Sd	NA	NA	NA	ST	ST	INV
9	SD-ZI138	SRR12356030	yes	Sd	NA	NA	NA	ST	ST	INV
10	SD-ZI157	SRR12356029	no	Sd	NA	NA	NA	ST	INV	ST
1	ZI348	SRR203475	no	Sd	ST	ST	NA	ST	ST	INV		0	0			In(2L)t	In(2R)NS
2	ZI213	SRR203329	no	Sd	ST	ST	NA	ST	ST	INV		0	0		agree	199	201
3	ZI353	SRR342394	no	Sd	ST	ST	NA	ST	ST	INV		0	0		disagree	4	2
4	ZI138	SRR203474	no	Sd	ST	ST	NA	ST	ST	ST		0	0			203	203
5	ZI157	SRR202089	no	Sd	ST	ST	NA	ST	ST	ST		0	0
6	ZI429	SRR346919	no	Sd	ST	ST	NA	ST	ST	ST		0	0
7	ZI264	SRR202095	no	Sd+	ST	ST	NA	ST	ST	ST		0	0		% agree	98.0296	99.0148
8	ZI233	SRR203347	no	Sd+	ST	ST	NA	ST	ST	ST		0	0
9	ZI261	SRR189424	no	Sd+	ST	ST	NA	ST	ST	ST		0	0
10	ZI268	SRR189425	no	Sd+	ST	ST	NA	ST	ST	ST		0	0
11	ZI468	SRR189426	no	Sd+	ST	ST	NA	ST	ST	ST		0	0			Count	Freq
12	ZI91	SRR189423	no	Sd+	ST	ST	NA	ST	ST	ST		0	0		In(2L)t	41	0.20098
13	ZI342	SRR094875	no	Sd+	INV	ST	NA	INV	ST	ST		0	0		In(2R)NS	25	0.122549
14	ZI221	SRR202074	no	Sd+	ST	ST	NA	ST	ST	ST		0	0
15	ZI207	SRR202075	no	Sd+	ST	ST	NA	ST	ST	ST		0	0
16	ZI232	SRR202076	no	Sd+	INV	ST	NA	INV	INV	ST		0	0
17	ZI26	SRR202077	no	Sd+	ST	ST	NA	ST	ST	ST		0	0
18	ZI457	SRR202078	no	Sd+	ST	ST	NA	ST	ST	ST		0	0		Frequency
19	ZI276	SRR202079	no	Sd+	INV	INV	NA	INV	INV	ST		0	0			In(2R)Mal	In(2R)Mal+
20	ZI466	SRR202080	no	Sd+	ST	INV	NA	ST	INV	ST		0	0		Sd	0.0147059	0.0147059
21	ZI267	SRR202081	no	Sd+	ST	ST	NA	ST	ST	ST		0	0		Sd+	0	0.970588
22	ZI476	SRR202082	no	Sd+	ST	ST	NA	ST	ST	ST		0	0
23	ZI291	SRR202083	no	Sd+	ST	ST	NA	ST	ST	ST		0	0
24	ZI225	SRR202084	no	Sd+	ST	ST	NA	ST	ST	ST		0	0
25	ZI394N	SRR202085	no	Sd+	INV	ST	NA	INV	ST	ST		0	0
26	ZI231	SRR202093	no	Sd+	ST	ST	NA	ST	ST	ST		0	0
27	ZI269	SRR202094	no	Sd+	INV	INV	NA	INV	INV	ST		0	0
28	ZI295	SRR202099	yes	Sd+	ST	INV	NA	ST	INV	ST		0	0
29	ZI418N	SRR202100	no	Sd+	ST	ST	NA	ST	ST	ST		0	0
30	ZI59	SRR202112	no	Sd+	ST	ST	NA	ST	ST	ST		0	0
31	ZI188	SRR202123	no	Sd+	ST	ST	NA	ST	ST	ST		0	0
32	ZI193	SRR202124	no	Sd+	ST	ST	NA	ST	ST	ST		0	0
33	ZI296	SRR202125	no	Sd+	ST	ST	NA	ST	ST	ST		0	0
34	ZI227	SRR202126	yes	Sd+	INV	ST	NA	INV	ST	ST		0	0
35	ZI250	SRR202127	no	Sd+	ST	ST	NA	ST	ST	ST		0	0
36	ZI191	SRR202128	no	Sd+	ST	ST	NA	ST	ST	ST		0	0
37	ZI359	SRR202129	no	Sd+	ST	ST	NA	ST	ST	ST		0	0
38	ZI228	SRR203064	no	Sd+	ST	ST	NA	ST	ST	ST		0	0
39	ZI220	SRR203067	no	Sd+	ST	ST	NA	ST	ST	ST		0	0
40	ZI184	SRR203068	no	Sd+	ST	ST	NA	ST	ST	ST		0	0
41	ZI181	SRR203069	no	Sd+	ST	ST	NA	ST	ST	ST		0	0
42	ZI103	SRR203226	no	Sd+	ST	ST	NA	ST	ST	ST		0	0
43	ZI400	SRR203227	no	Sd+	ST	ST	NA	ST	ST	ST		0	0
44	ZI386	SRR203228	no	Sd+	ST	ST	NA	ST	ST	ST		0	0
45	ZI210	SRR203229	no	Sd+	ST	ST	NA	ST	ST	ST		0	0
46	ZI198	SRR203230	yes	Sd+	INV	ST	NA	INV	ST	ST		0	0
47	ZI86	SRR203231	no	Sd+	ST	ST	NA	ST	ST	ST		0	0
48	ZI129	SRR203232	no	Sd+	ST	ST	NA	ST	ST	ST		0	0
49	ZI179	SRR203233	yes	Sd+	ST	INV	NA	ST	INV	ST		0	0
50	ZI200	SRR203234	no	Sd+	ST	ST	NA	ST	ST	ST		0	0
51	ZI218	SRR203235	no	Sd+	ST	ST	NA	ST	ST	ST		0	0
52	ZI365	SRR203236	no	Sd+	ST	ST	NA	ST	ST	ST		0	0
53	ZI293	SRR203237	no	Sd+	ST	ST	NA	ST	ST	ST		0	0
54	ZI202	SRR203238	no	Sd+	ST	ST	NA	ST	ST	ST		0	0
55	ZI194	SRR203319	no	Sd+	ST	ST	NA	ST	ST	ST		0	0
56	ZI240	SRR203324	yes	Sd+	INV	ST	NA	INV	ST	ST		0	0
57	ZI313	SRR203327	no	Sd+	INV	ST	NA	ST	ST	ST		0	0
58	ZI216N	SRR203328	yes	Sd+	ST	INV	NA	ST	INV	ST		0	0
59	ZI173	SRR203330	no	Sd+	ST	ST	NA	ST	ST	ST		0	0
60	ZI214	SRR203331	no	Sd+	ST	ST	NA	ST	ST	ST		0	0
61	ZI237	SRR203332	yes	Sd+	ST	INV	NA	ST	ST	ST		0	0
62	ZI50N	SRR203334	no	Sd+	ST	ST	NA	ST	ST	ST		0	0
63	ZI254N	SRR203335	no	Sd+	ST	ST	NA	ST	ST	ST		0	0
64	ZI126	SRR203336	no	Sd+	ST	ST	NA	ST	ST	ST		0	0
65	ZI226	SRR203348	yes	Sd+	ST	INV	NA	ST	INV	ST		0	0
66	ZI252	SRR203349	no	Sd+	ST	ST	NA	ST	ST	ST		0	0
67	ZI253	SRR203350	yes	Sd+	INV	ST	NA	INV	ST	ST		0	0
68	ZI319	SRR203461	no	Sd+	ST	ST	NA	ST	ST	ST		0	0
69	ZI368	SRR203462	no	Sd+	ST	ST	NA	ST	ST	ST		0	0
70	ZI444	SRR203463	no	Sd+	INV	ST	NA	ST	ST	ST		0	0
71	ZI378	SRR203464	no	Sd+	ST	ST	NA	ST	ST	ST		0	0
72	ZI472	SRR203465	no	Sd+	ST	ST	NA	ST	ST	ST		0	0
73	ZI456	SRR203466	no	Sd+	INV	ST	NA	INV	ST	ST		0	0
74	ZI196	SRR203467	no	Sd+	ST	ST	NA	ST	ST	ST		0	0
75	ZI199	SRR203468	no	Sd+	ST	ST	NA	ST	ST	ST		0	0
76	ZI527	SRR203469	no	Sd+	INV	INV	NA	INV	INV	ST		0	0
77	ZI211	SRR203470	no	Sd+	ST	ST	NA	ST	ST	ST		0	0
78	ZI335	SRR203471	no	Sd+	ST	ST	NA	ST	ST	ST		0	0
79	ZI61	SRR203472	no	Sd+	INV	ST	NA	INV	ST	ST		0	0
80	ZI182	SRR203473	yes	Sd+	ST	INV	NA	ST	INV	ST		0	0
81	ZI445	SRR203476	no	Sd+	INV	ST	NA	INV	ST	ST		0	0
82	ZI178	SRR203496	no	Sd+	ST	ST	NA	ST	ST	ST		0	0
83	ZI28	SRR203497	no	Sd+	ST	ST	NA	ST	ST	ST		0	0
84	ZI377	SRR203498	no	Sd+	ST	ST	NA	ST	ST	ST		0	0
85	ZI420	SRR203499	no	Sd+	ST	ST	NA	ST	ST	ST		0	0
86	ZI471	SRR203500	no	Sd+	ST	ST	NA	ST	ST	ST		0	0
87	ZI10	SRR203502	no	Sd+	ST	INV	NA	ST	INV	ST		0	0
88	ZI219	SRR203503	no	Sd+	ST	ST	NA	ST	ST	ST		0	0
89	ZI433	SRR203504	no	Sd+	ST	ST	NA	ST	ST	ST		0	0
90	ZI490	SRR203505	no	Sd+	ST	ST	NA	ST	ST	ST		0	0
91	ZI206	SRR203506	yes	Sd+	INV	ST	NA	INV	ST	ST		0	0
92	ZI336	SRR203507	no	Sd+	ST	ST	NA	ST	ST	ST		0	0
93	ZI85	SRR203508	no	Sd+	ST	ST	NA	ST	ST	ST		0	0
94	ZI413	SRR203509	no	Sd+	ST	ST	NA	ST	ST	ST		0	0
95	ZI314	SRR203510	no	Sd+	ST	ST	NA	ST	ST	ST		0	0
96	ZI341	SRR203645	no	Sd+	ST	ST	NA	ST	ST	ST		0	0
97	ZI329	SRR204006	no	Sd+	ST	ST	NA	ST	ST	ST		0	0
98	ZI136	SRR204007	no	Sd+	INV	INV	NA	INV	INV	ST		0	0
99	ZI374	SRR204008	no	Sd+	INV	ST	NA	INV	ST	ST		0	0
100	ZI530	SRR204009	no	Sd+	INV	INV	NA	INV	INV	ST		0	0
101	ZI381	SRR204010	no	Sd+	ST	ST	NA	ST	ST	ST		0	0
102	ZI317	SRR204011	no	Sd+	ST	ST	NA	ST	ST	ST		0	0
103	ZI212	SRR204012	no	Sd+	ST	ST	NA	ST	ST	ST		0	0
104	ZI364	SRR204013	yes	Sd+	ST	INV	NA	ST	INV	ST		0	0
105	ZI324	SRR204014	no	Sd+	ST	ST	NA	ST	ST	ST		0	0
106	ZI90	SRR204016	no	Sd+	ST	ST	NA	ST	ST	ST		0	0
107	ZI265	SRR204017	no	Sd+	ST	ST	NA	ST	ST	ST		0	0
108	ZI190	SRR204018	no	Sd+	ST	ST	NA	ST	ST	ST		0	0
109	ZI379	SRR204019	no	Sd+	ST	ST	NA	ST	ST	ST		0	0
110	ZI373	SRR210782	no	Sd+	ST	ST	NA	ST	ST	ST		0	0
111	ZI263	SRR210783	no	Sd+	INV	ST	NA	INV	ST	ST		0	0
112	ZI255	SRR210784	yes	Sd+	ST	INV	NA	ST	INV	ST		0	0
113	ZI380	SRR210785	no	Sd+	ST	ST	NA	ST	ST	ST		0	0
114	ZI273N	SRR210786	no	Sd+	ST	ST	NA	ST	ST	ST		0	0
115	ZI170	SRR210787	no	Sd+	ST	ST	NA	ST	ST	ST		0	0
116	ZI333	SRR210788	no	Sd+	ST	ST	NA	ST	ST	ST		0	0
117	ZI68	SRR210789	no	Sd+	ST	ST	NA	ST	ST	ST		0	0
118	ZI448	SRR210790	yes	Sd+	ST	INV	NA	ST	INV	ST		0	0
119	ZI235	SRR210792	no	Sd+	INV	INV	NA	INV	INV	ST		0	0
120	ZI176	SRR210794	no	Sd+	ST	ST	NA	ST	ST	ST		0	0
121	ZI316	SRR248059	no	Sd+	INV	ST	NA	INV	ST	ST		0	0
122	ZI370	SRR248060	no	Sd+	ST	ST	NA	ST	ST	ST		0	0
123	ZI460	SRR248108	no	Sd+	ST	ST	NA	ST	ST	ST		0	0
124	ZI286	SRR248122	no	Sd+	ST	ST	NA	ST	ST	ST		0	0
125	ZI76	SRR248123	no	Sd+	INV	ST	NA	INV	ST	ST		0	0
126	ZI504	SRR248124	no	Sd+	ST	ST	NA	ST	ST	ST		0	0
127	ZI279	SRR248125	no	Sd+	ST	ST	NA	ST	ST	ST		0	0
128	ZI230	SRR248127	no	Sd+	ST	ST	NA	ST	ST	ST		0	0
129	ZI81	SRR248128	no	Sd+	INV	ST	NA	INV	ST	ST		0	0
130	ZI165	SRR248129	no	Sd+	ST	ST	NA	ST	ST	ST		0	0
131	ZI117	SRR248130	yes	Sd+	INV	ST	NA	INV	ST	ST		0	0
132	ZI458	SRR248131	no	Sd+	ST	ST	NA	ST	ST	ST		0	0
133	ZI453	SRR309274	no	Sd+	ST	ST	NA	ST	ST	ST		0	0
134	ZI344	SRR309275	no	Sd+	ST	ST	NA	ST	ST	ST		0	0
135	ZI271	SRR309276	no	Sd+	ST	ST	NA	ST	ST	ST		0	0
136	ZI321	SRR309277	no	Sd+	INV	INV	NA	INV	INV	ST		0	0
137	ZI339	SRR309278	no	Sd+	INV	ST	NA	INV	ST	ST		0	0
138	ZI239	SRR309279	no	Sd+	ST	ST	NA	ST	ST	ST		0	0
139	ZI388	SRR309280	no	Sd+	ST	ST	NA	ST	ST	ST		0	0
140	ZI292	SRR309281	no	Sd+	ST	ST	NA	ST	ST	ST		0	0
141	ZI152	SRR326790	no	Sd+	ST	ST	NA	ST	ST	ST		0	0
142	ZI421	SRR326791	no	Sd+	ST	ST	NA	ST	ST	ST		0	0
143	ZI488	SRR326792	no	Sd+	INV	ST	NA	INV	ST	ST		0	0
144	ZI320	SRR326793	no	Sd+	ST	ST	NA	ST	ST	ST		0	0
145	ZI303	SRR326794	no	Sd+	ST	ST	NA	ST	ST	ST		0	0
146	ZI524	SRR326795	no	Sd+	INV	INV	NA	ST	INV	ST		0	0
147	ZI177	SRR326796	no	Sd+	ST	ST	NA	ST	ST	ST		0	0
148	ZI311N	SRR326797	no	Sd+	ST	ST	NA	ST	ST	ST		0	0
149	ZI241	SRR326798	no	Sd+	ST	ST	NA	ST	ST	ST		0	0
150	ZI437	SRR326799	no	Sd+	ST	ST	NA	ST	ST	ST		0	0
151	ZI172	SRR326800	no	Sd+	ST	ST	NA	ST	ST	ST		0	0
152	ZI27	SRR326801	no	Sd+	INV	INV	NA	INV	INV	ST		0	0
153	ZI395	SRR326802	no	Sd+	INV	ST	NA	INV	ST	ST		0	0
154	ZI134N	SRR326933	no	Sd+	ST	ST	NA	ST	ST	ST		0	0
155	ZI332	SRR342392	no	Sd+	ST	ST	NA	ST	ST	ST		0	0
156	ZI281	SRR342393	no	Sd+	ST	ST	NA	ST	ST	ST		0	0
157	ZI197N	SRR342395	no	Sd+	ST	ST	NA	ST	ST	ST		0	0
158	ZI523	SRR342396	no	Sd+	ST	ST	NA	ST	ST	ST		0	0
159	ZI446	SRR342397	no	Sd+	INV	ST	NA	INV	ST	ST		0	0
160	ZI351	SRR346920	no	Sd+	ST	INV	NA	ST	INV	ST		0	0
161	ZI164	SRR346921	no	Sd+	ST	ST	NA	ST	ST	ST		0	0
162	ZI382	SRR346922	yes	Sd+	ST	ST	NA	ST	ST	ST		0	0
163	ZI443	SRR346923	no	Sd+	ST	ST	NA	ST	ST	ST		0	0
164	ZI31N	SRR346924	no	Sd+	ST	ST	NA	ST	ST	ST		0	0
165	ZI467	SRR346925	no	Sd+	INV	INV	NA	INV	INV	ST		0	0
166	ZI112N	SRR346926	no	Sd+	NA	NA	NA	INV	ST	ST		NA	NA
167	ZI99	SRR346927	no	Sd+	ST	ST	NA	ST	ST	ST		0	0
168	ZI358	SRR346928	no	Sd+	ST	ST	NA	ST	ST	ST		0	0
169	ZI508	SRR346929	no	Sd+	ST	ST	NA	ST	ST	ST		0	0
170	ZI398	SRR346930	no	Sd+	ST	ST	NA	ST	ST	ST		0	0
171	ZI56	SRR346931	no	Sd+	ST	INV	NA	ST	INV	ST		0	0
172	ZI362	SRR346932	no	Sd+	ST	ST	NA	ST	ST	ST		0	0
173	ZI396	SRR353757	no	Sd+	INV	ST	NA	INV	ST	ST		0	0
174	ZI517	SRR353758	no	Sd+	ST	ST	NA	ST	ST	ST		0	0
175	ZI161	SRR353759	yes	Sd+	INV	ST	NA	INV	ST	ST		0	0
176	ZI477	SRR353760	no	Sd+	ST	ST	NA	ST	ST	ST		0	0
177	ZI402	SRR353999	no	Sd+	ST	ST	NA	ST	ST	ST		0	0
178	ZI357N	SRR354000	no	Sd+	INV	INV	NA	INV	INV	ST		0	0
179	ZI251N	SRR354001	no	Sd+	ST	ST	NA	ST	ST	ST		0	0
180	ZI392	SRR354002	no	Sd+	ST	ST	NA	ST	ST	ST		0	0
181	ZI405	SRR354003	no	Sd+	INV	ST	NA	ST	ST	ST		0	0
182	ZI384	SRR354004	no	Sd+	ST	ST	NA	ST	ST	ST		0	0
183	ZI447	SRR371534	no	Sd+	ST	ST	NA	ST	ST	ST		0	0
184	ZI104	SRR654551	no	Sd+	ST	ST	NA	ST	ST	ST		0	0
185	ZI167	SRR654553	no	Sd+	ST	ST	NA	ST	ST	ST		0	0
186	ZI284	SRR654554	no	Sd+	INV	ST	NA	INV	ST	ST		0	0
187	ZI431	SRR654556	no	Sd+	ST	ST	NA	ST	ST	ST		0	0
188	ZI486	SRR654647	no	Sd+	INV	ST	NA	INV	ST	ST		0	0
189	ZI491	SRR654648	no	Sd+	ST	ST	NA	ST	ST	ST		0	0
190	ZI505	SRR654649	no	Sd+	INV	ST	NA	INV	ST	ST		0	0
191	ZI114N	SRR654662	yes	Sd+	INV	ST	NA	INV	ST	ST		0	0
192	ZI118N	SRR654664	yes	Sd+	INV	ST	NA	INV	ST	ST		0	0
193	ZI185	SRR654669	no	Sd+	ST	ST	NA	ST	ST	ST		0	0
194	ZI33	SRR654674	no	Sd+	ST	ST	NA	ST	ST	ST		0	0
195	ZI352	SRR654676	no	Sd+	INV	ST	NA	INV	ST	ST		0	0
196	ZI397N	SRR654677	no	Sd+	INV	ST	NA	INV	ST	ST		0	0
197	ZI455N	SRR654678	no	Sd+	ST	ST	NA	ST	ST	ST		0	0
198	ZI514N	SRR654679	no	Sd+	ST	ST	NA	ST	ST	ST		0	0
199	ZI225	SRR654680	no	Sd+	ST	ST	NA	ST	ST	ST		0	0
200	ZI230	SRR654681	no	Sd+	ST	ST	NA	ST	ST	ST		0	0
201	ZI271	SRR654682	no	Sd+	ST	ST	NA	ST	ST	ST		0	0
202	ZI453	SRR654683	no	Sd+	ST	ST	NA	ST	ST	ST		0	0
203	ZI351	SRR654684	no	Sd+	ST	INV	NA	ST	INV	ST		0	0
204	ZI362	SRR654685	no	Sd+	ST	ST	NA	ST	ST	ST		0	0
