# Supplementary material for: Epistatic selection on a selfish Segregation Distorter supergene – drive, recombination, and genetic load
Source: eLife. 2022 Apr 29;11:e78981. doi: 10.7554/eLife.78981 (PMC9122502; doi:10.7554/eLife.78981)
Supplement: Supplementary file 6. [file elife-78981-supp6.xls]

## Sheet: Sheet1
Region			SD+	SD	SD+*f	t-test p-value SD+ vs SD	t-test p-value SD vs SD+*f
2L	whole arm	mean Pi	0.00973	0.0091	0.000143	3.04201e-07	0
		st.dev	0.00341	0.00436	5.01e-05
	Distal to Sd	mean Pi	0.0103	0.0103	0.000152	0.56434	0
		st.dev	4.45e-05	0.00303	0.00225
	Proximal to Sd	mean Pi	0.00516	0.000115	7.59e-05	6.03316e-79	0.00116326
		st.dev	0.00265	0.000178	3.89e-05
2R	whole arm	mean Pi	0.00798	0.0013	0.000117	0	2.50382e-63
		st.dev	0.00349	0.00293	5.13e-05
	In(2R)Mal (2R:8.86-18.77)	mean Pi	0.00895	7.95e-05	0.000132	0	1.3971e-33
		st.dev	0.00296	0.000118	4.36e-05
SD-Mal supergene	2L:19.44-2R:21.90	mean Pi	0.00758	9.22e-05	0.000111	0	7.52436e-08
		st.dev	0.00356	0.00014	5.23e-05

## Sheet: Sheet2
Region		SD+	SD	SD+*f	SD (minus ZI138)	t-test p-value SD+ vs SD	t-test p-value SD vs SD+*f	t-test p-value SD vs SD(minusZI138)	t-test p-value SD(minusZI138) vs. SD+	t-test p-value SD(minusZI138) vs. SD+*f
Distal RanGAP	mean Pi	0.010308	0.0102505	0.000151528	0.0102634	0.572669	0	0.901557	0.667818	0
	st.dev	0.0030114	0.00308666	4.42676e-05	0.00314816
Proximal RanGAP	mean Pi	0.00443772	9.39011e-05	6.52345e-05	7.98332e-05	5.83764e-90	0.0026974	0.279797	1.49468e-90	0.122171
	st.dev	0.00275168	0.000165936	4.04496e-05	0.000165132
In(2R)Mal	mean Pi	0.00893555	7.96914e-05	0.000131353	4.59436e-05	0	1.41979e-33	1.80661e-11	0	9.65712e-112
	st.dev	0.00294531	0.000118297	4.32961e-05	9.48154e-05
