# Supplementary figures and images for: Epistatic selection on a selfish Segregation Distorter supergene – drive, recombination, and genetic load
Source: eLife journal article supplement (doi:10.7554/elife.78981), 2022-04-29

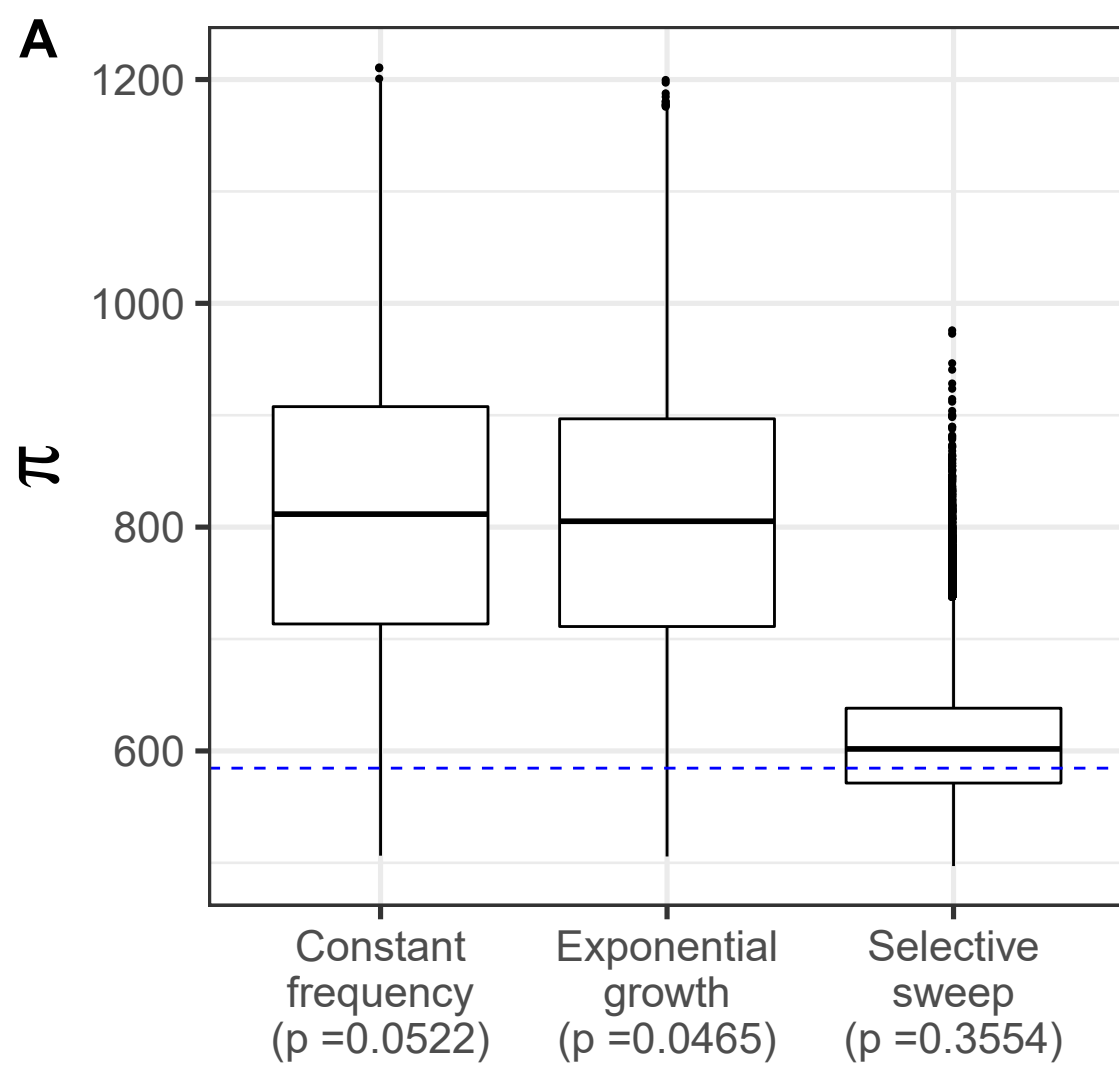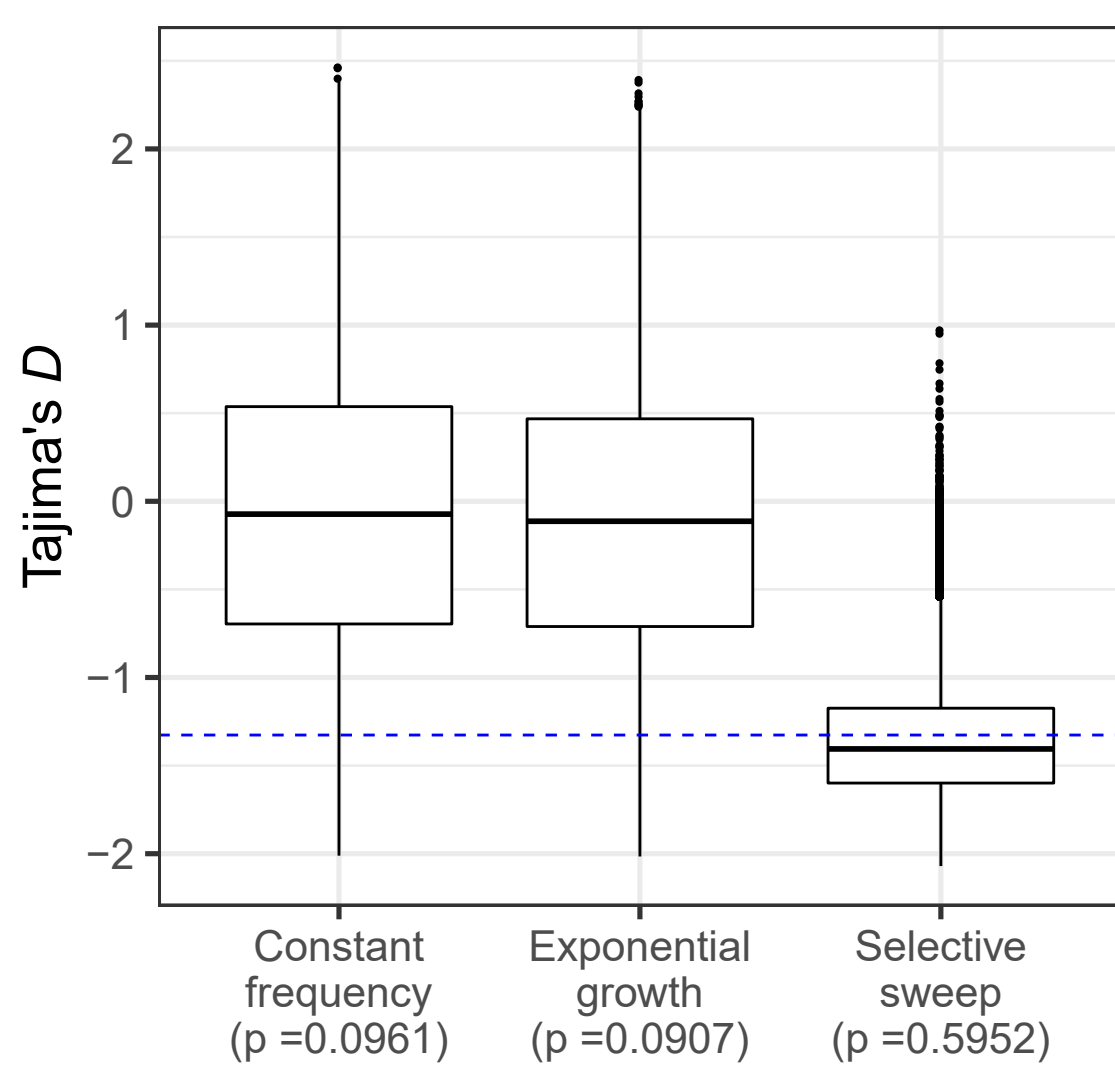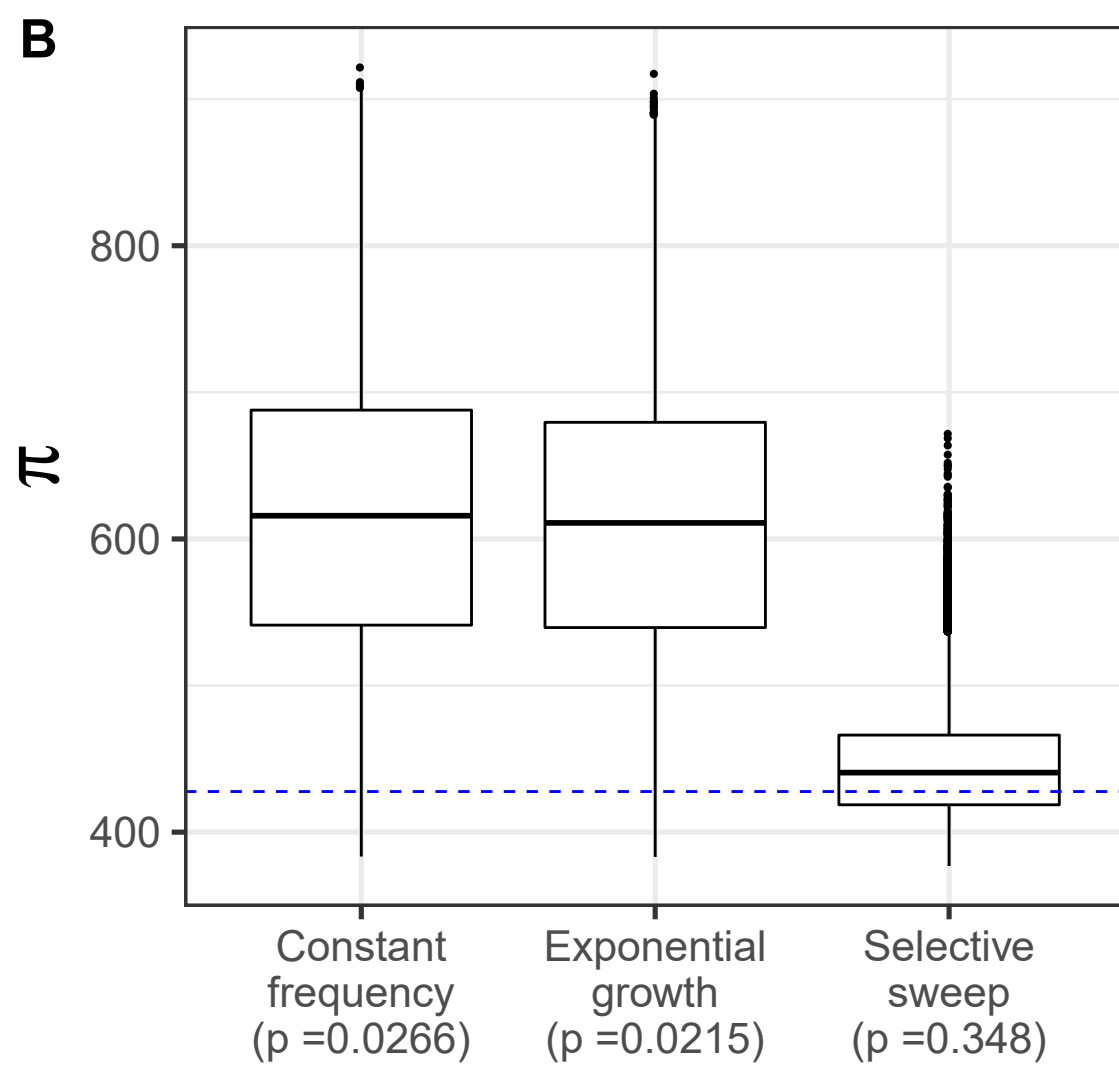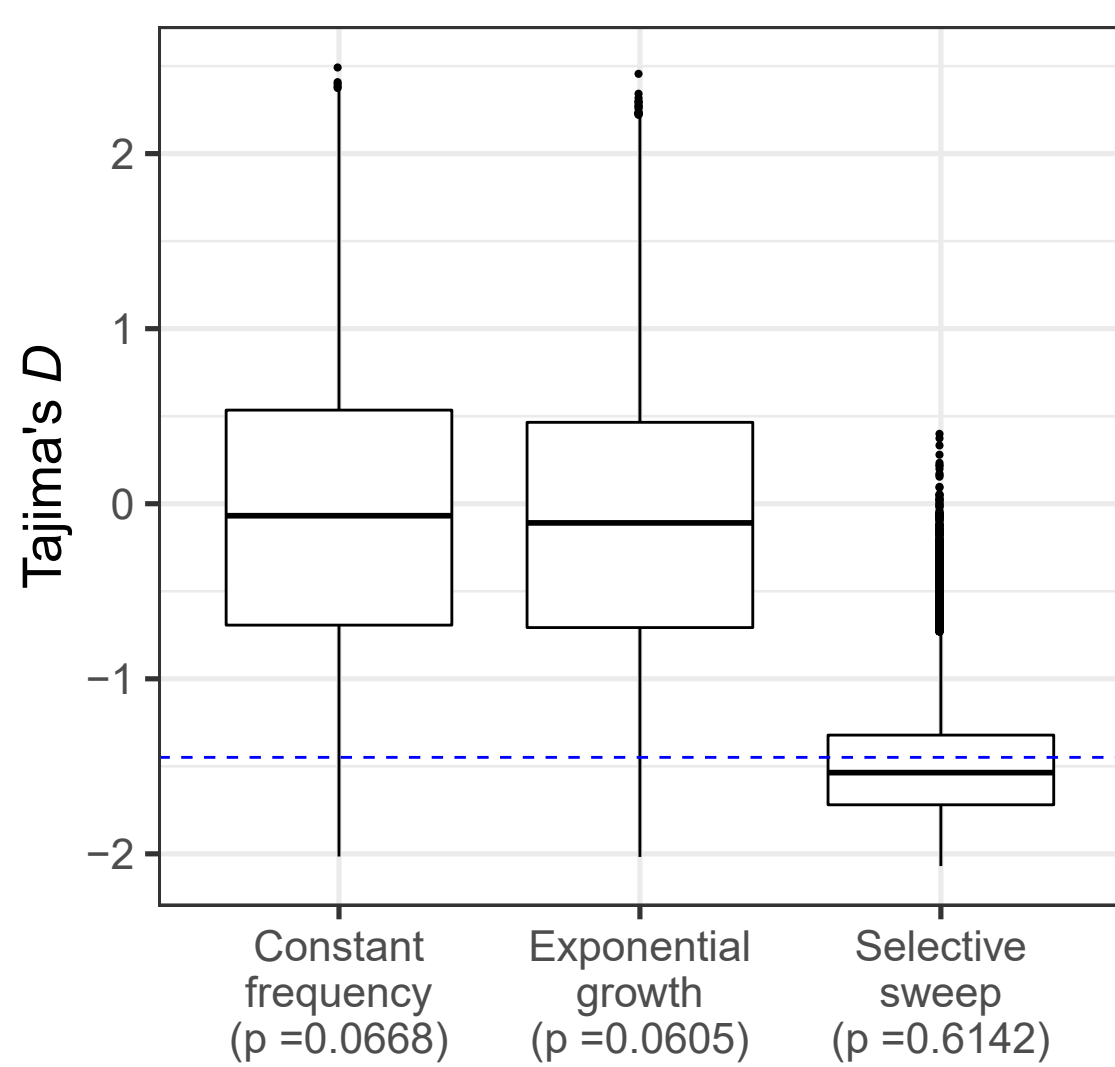

Supplement: supp [file elife-78981-supp-v1.zip]

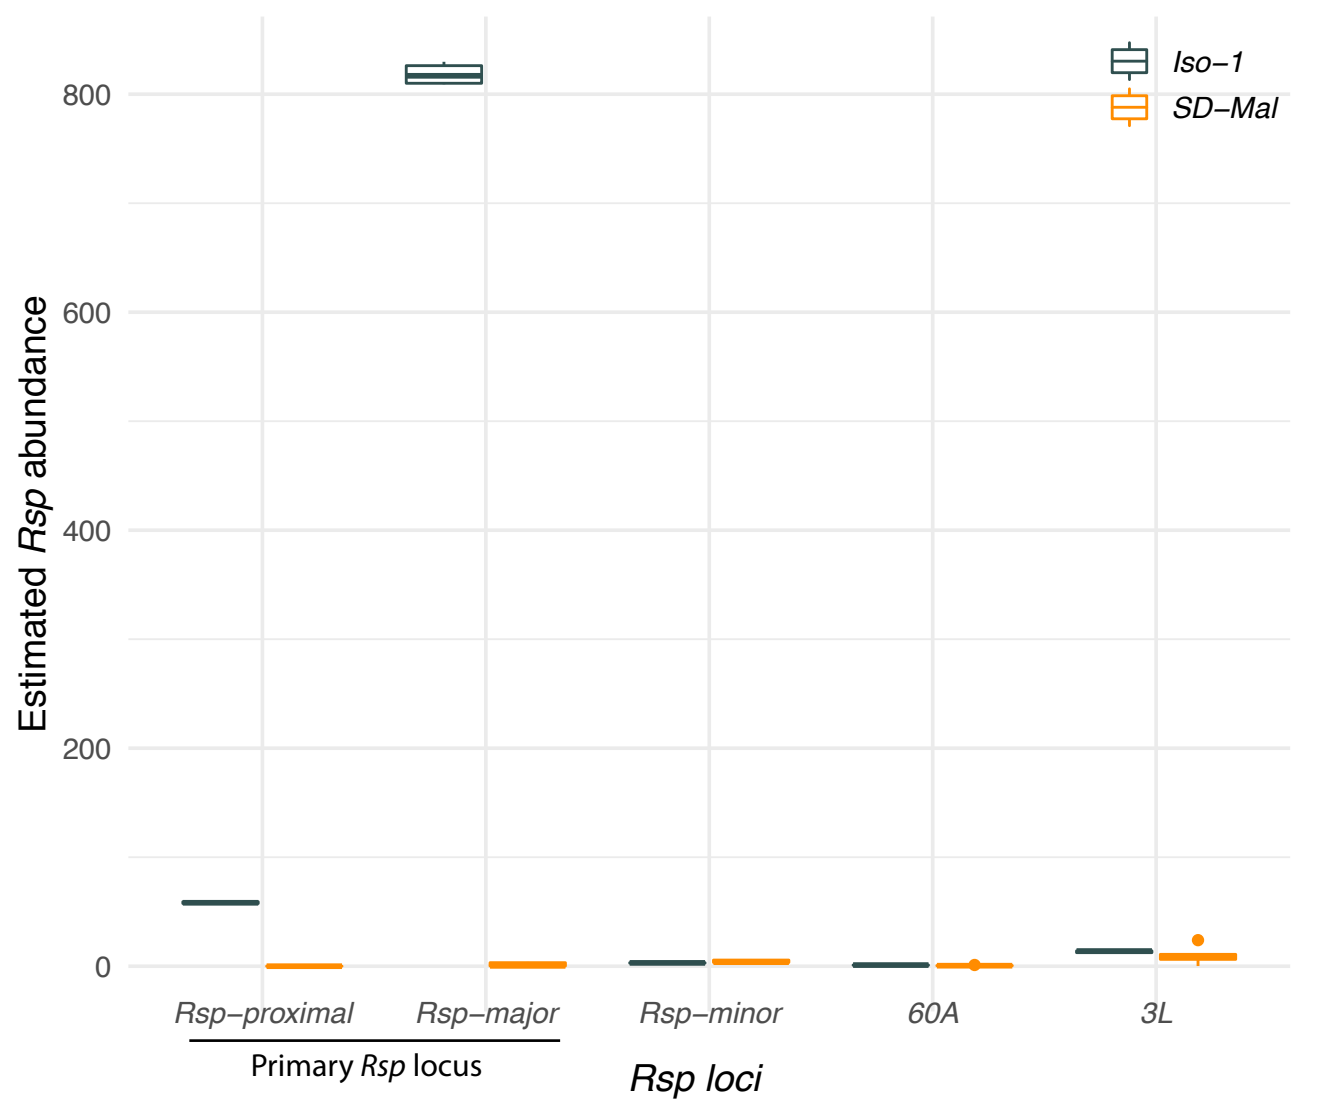

Supplement: supp [file elife-78981-supp-v1.zip]

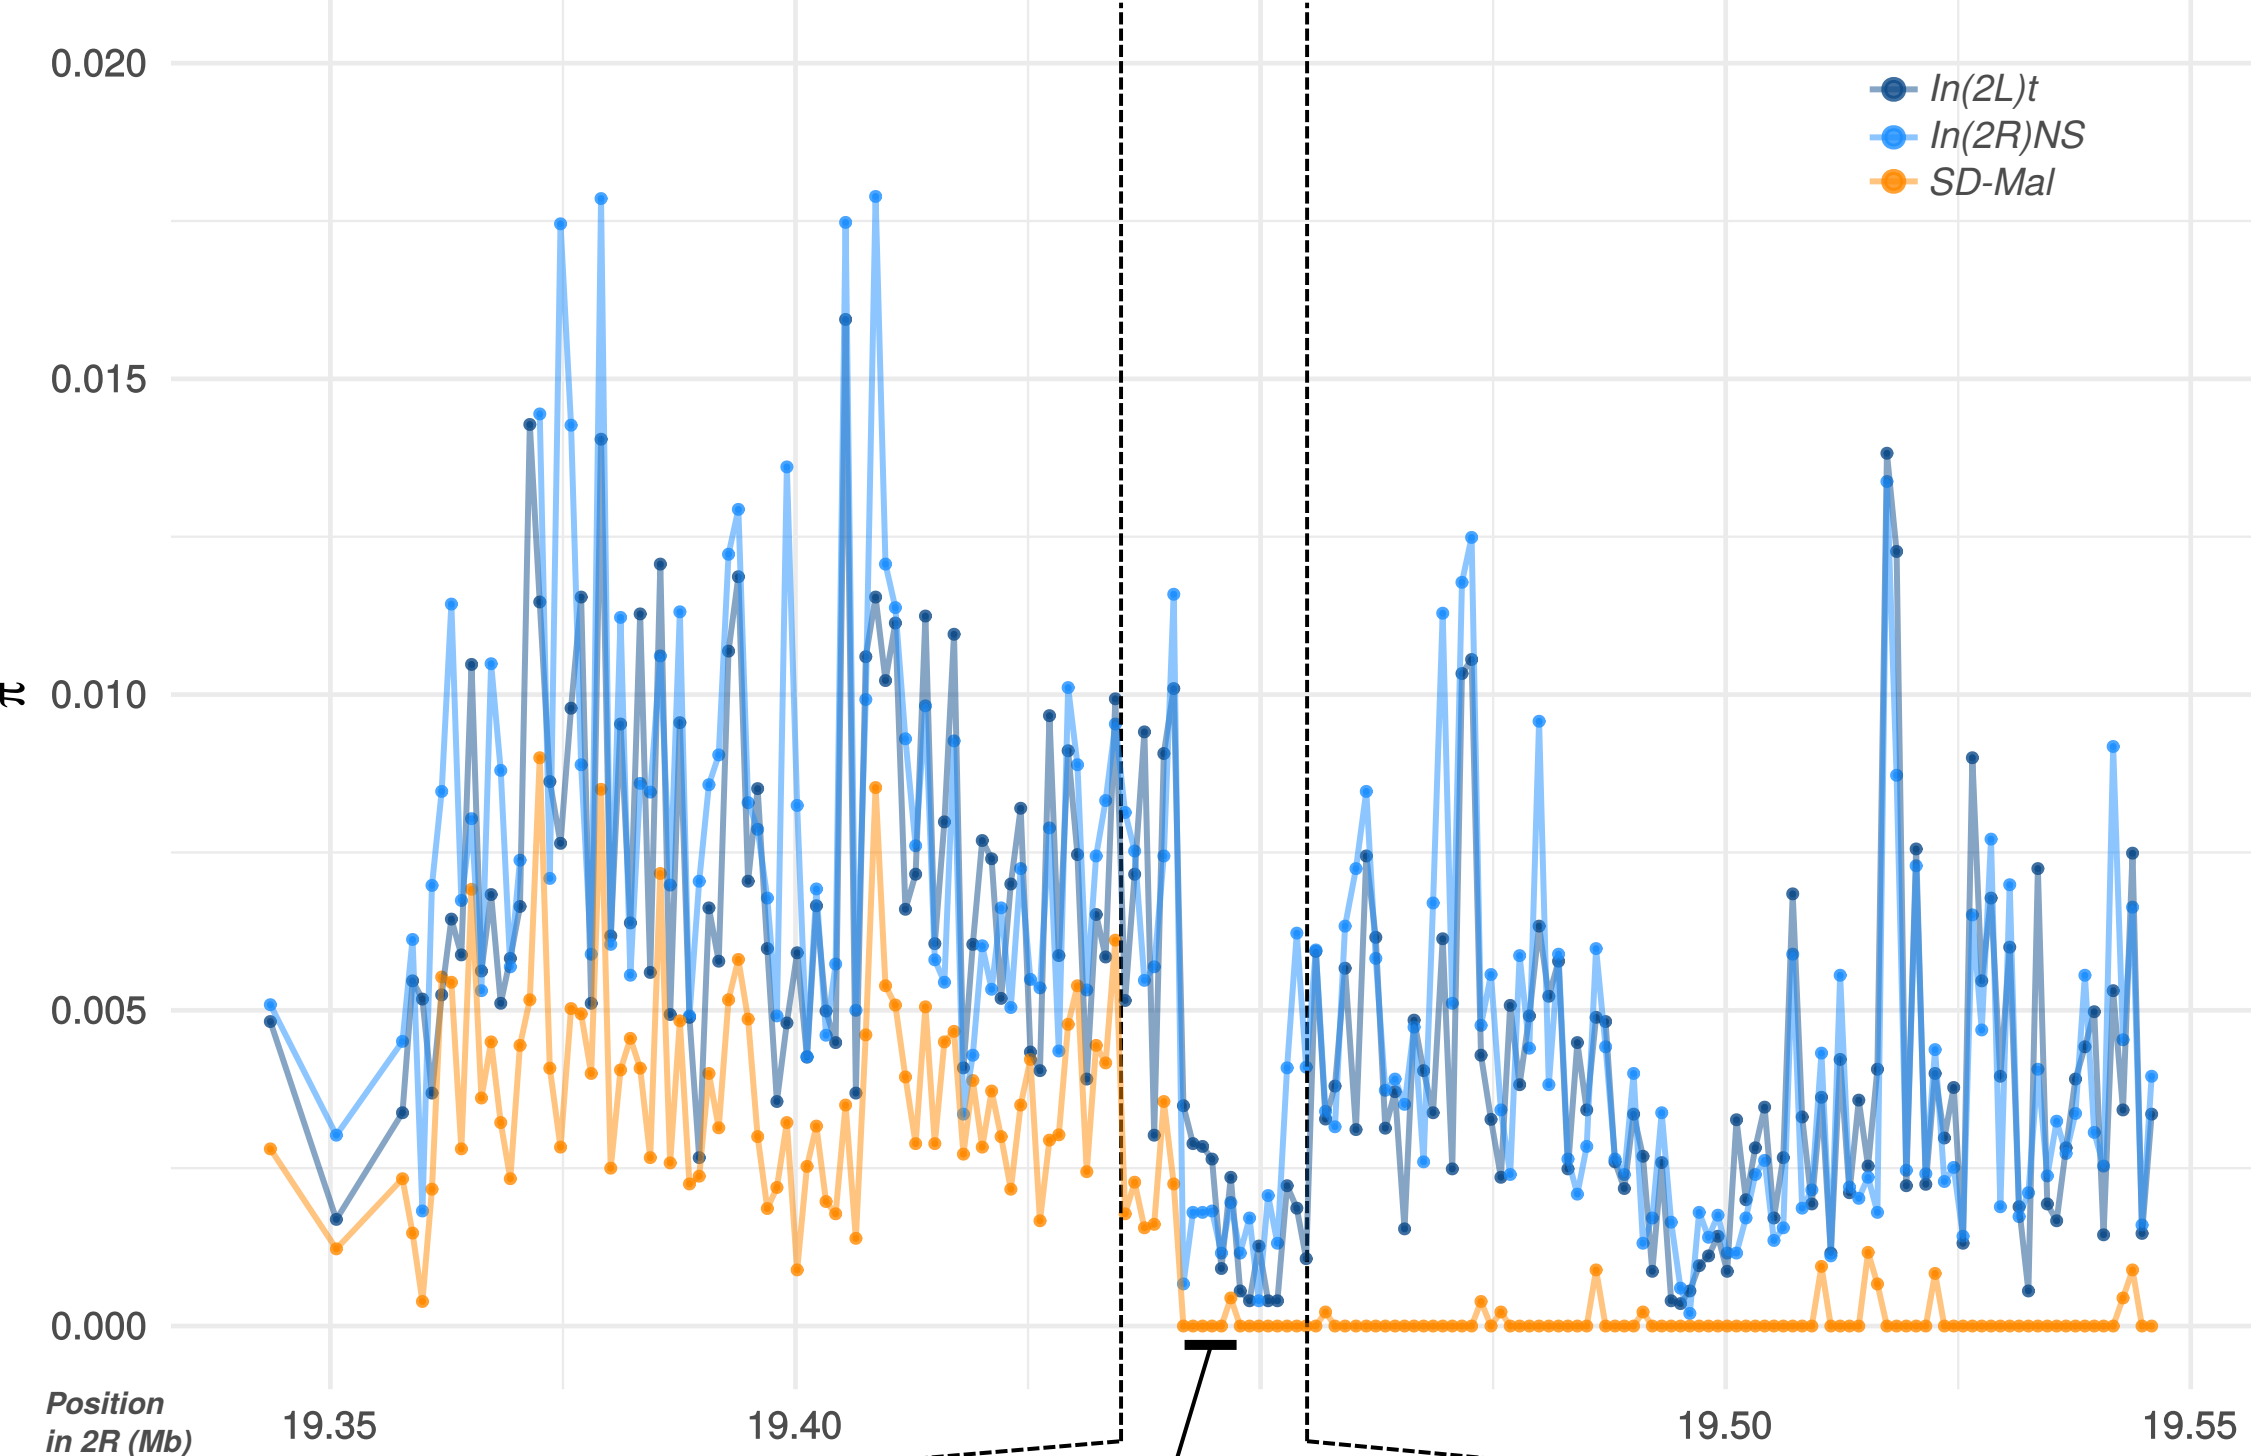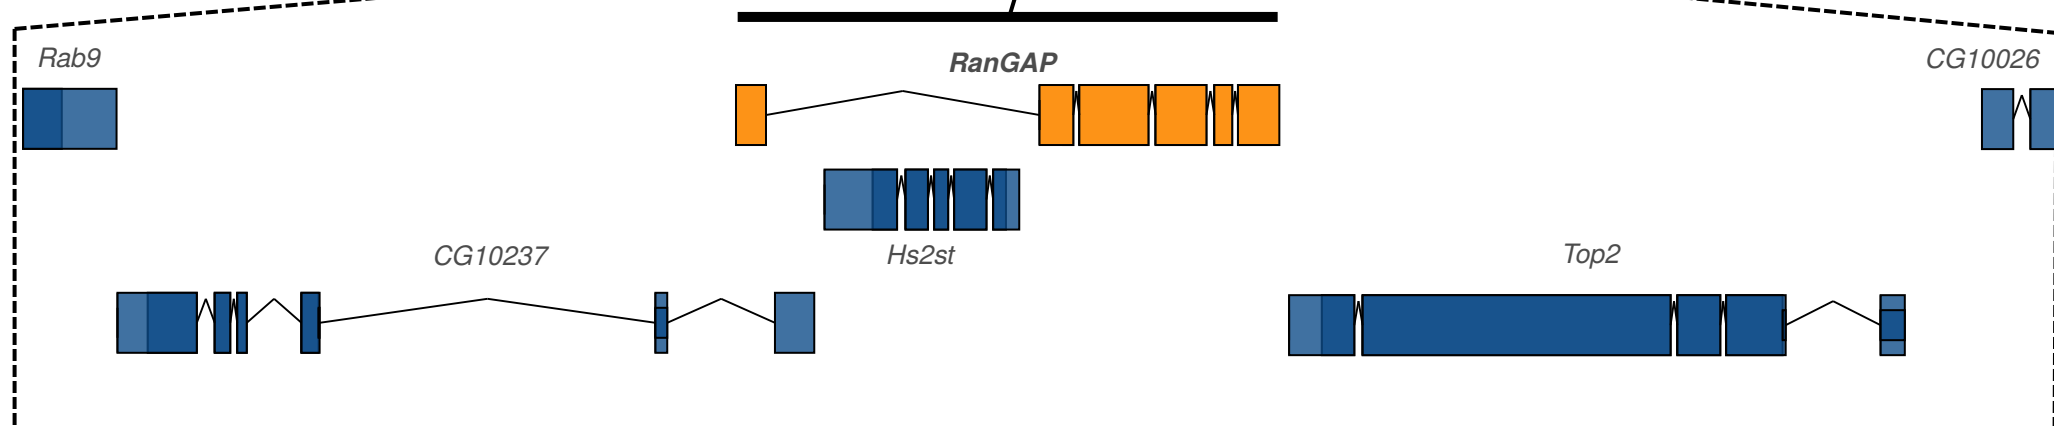

Supplement: supp [file elife-78981-supp-v1.zip]

$2L$  $2R$ 

TE insertions

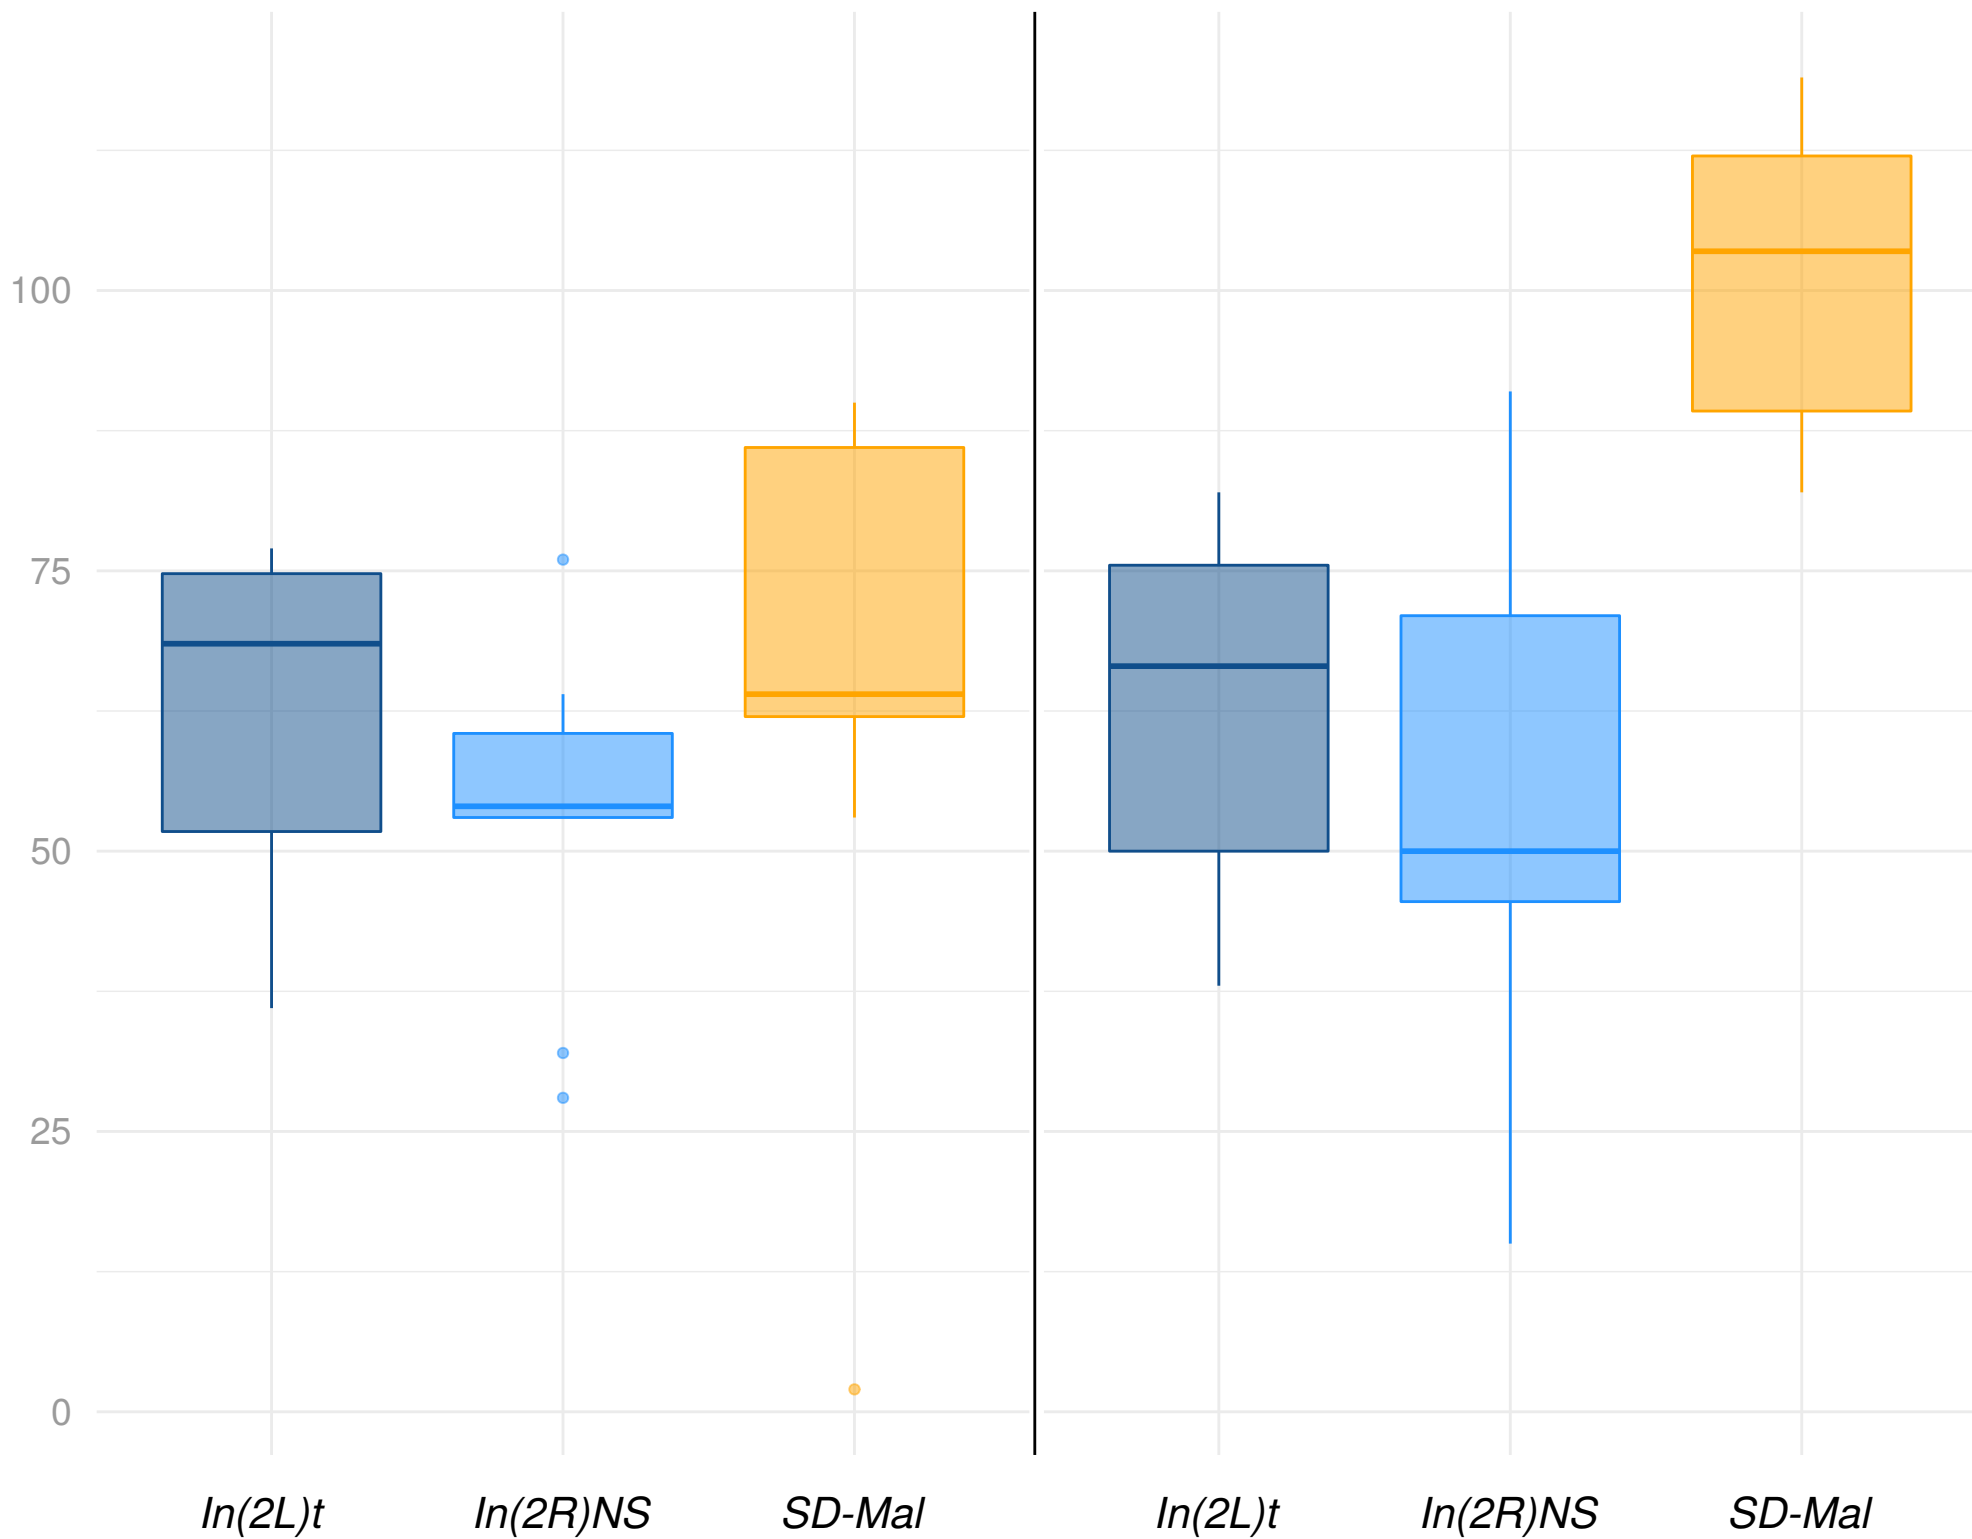

Supplement: supp [file elife-78981-supp-v1.zip]

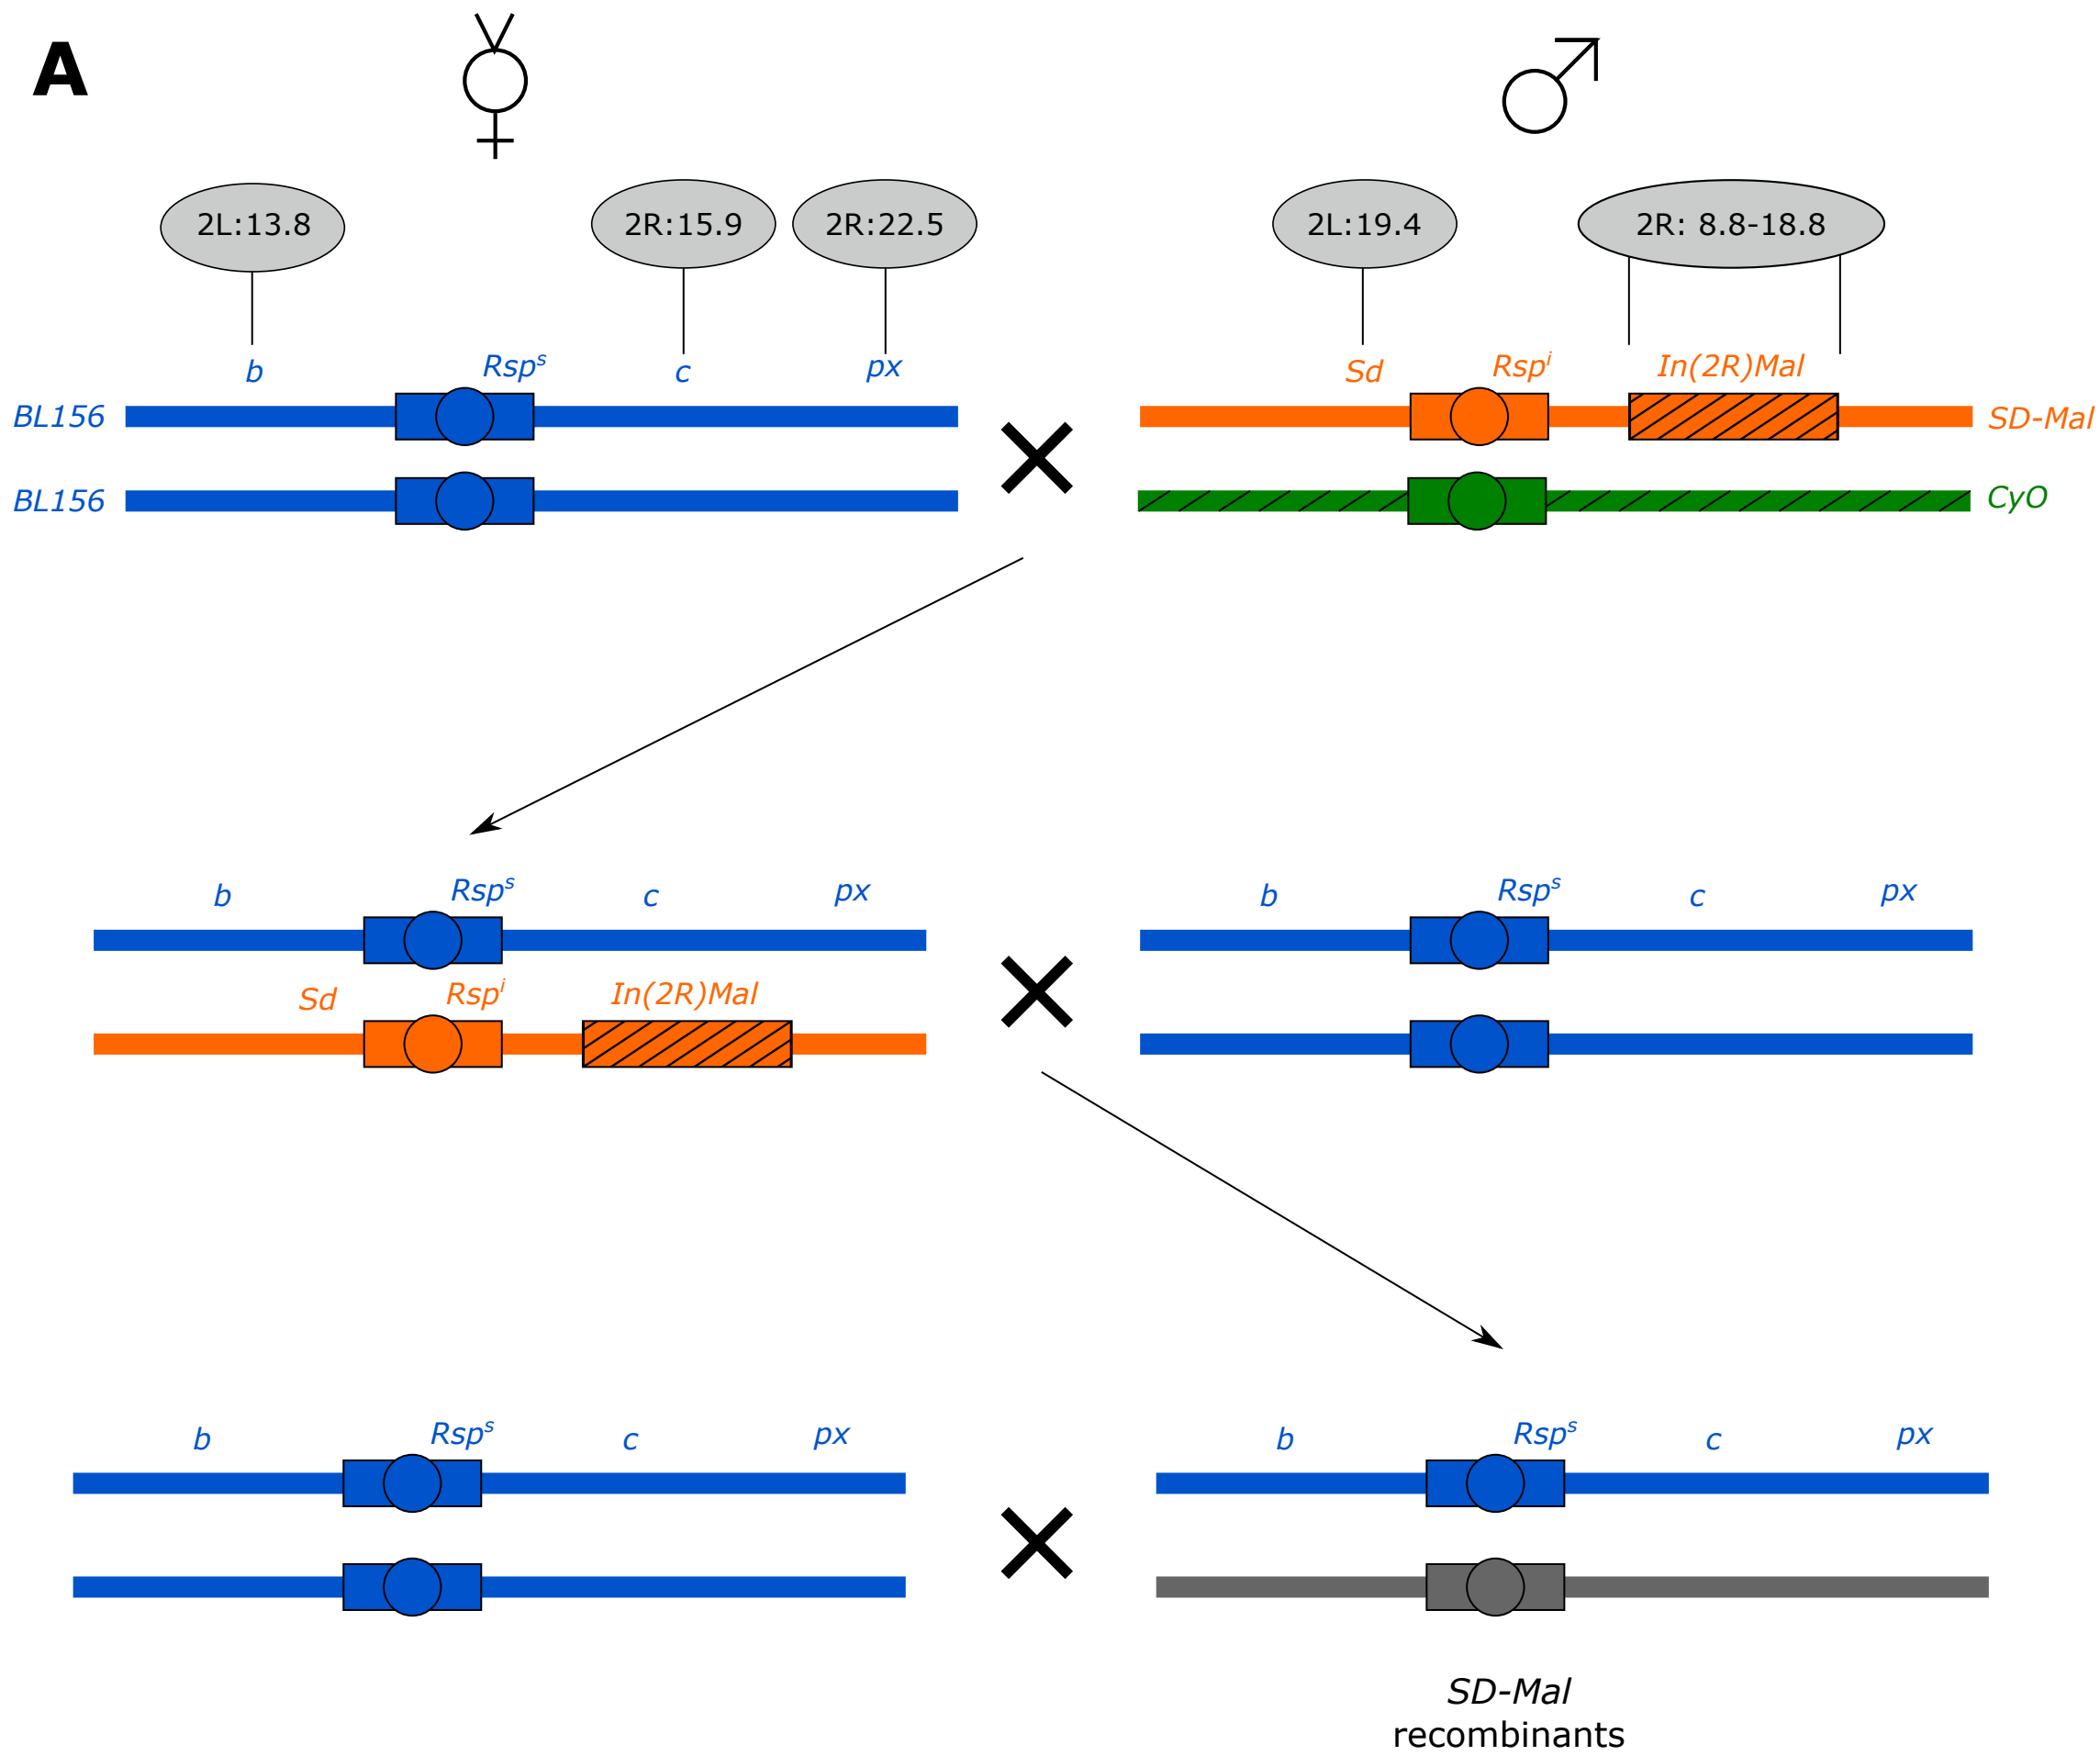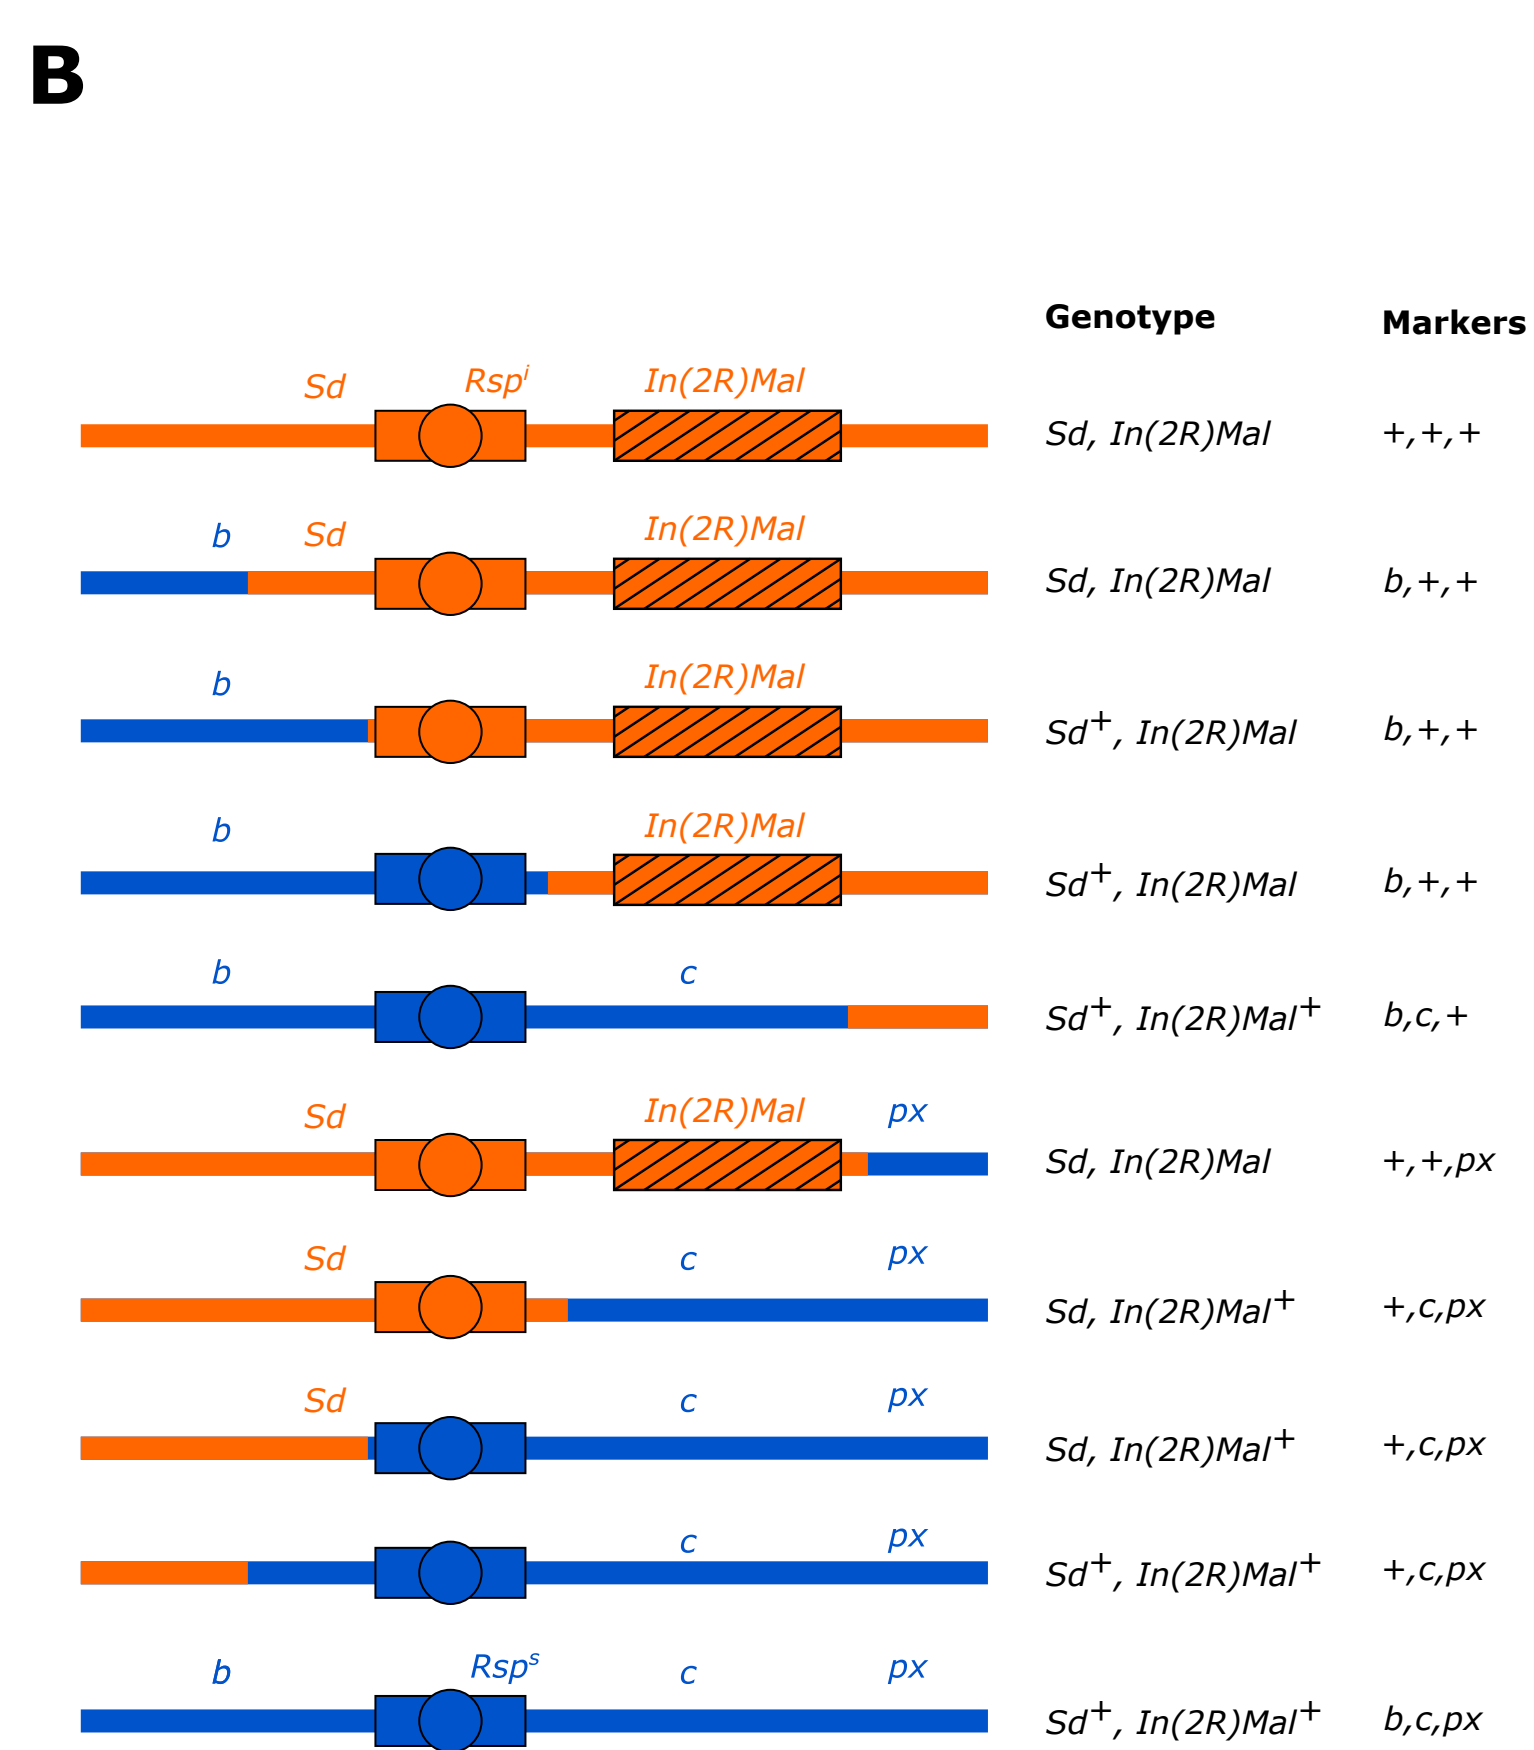

Supplement: supp [file elife-78981-supp-v1.zip]

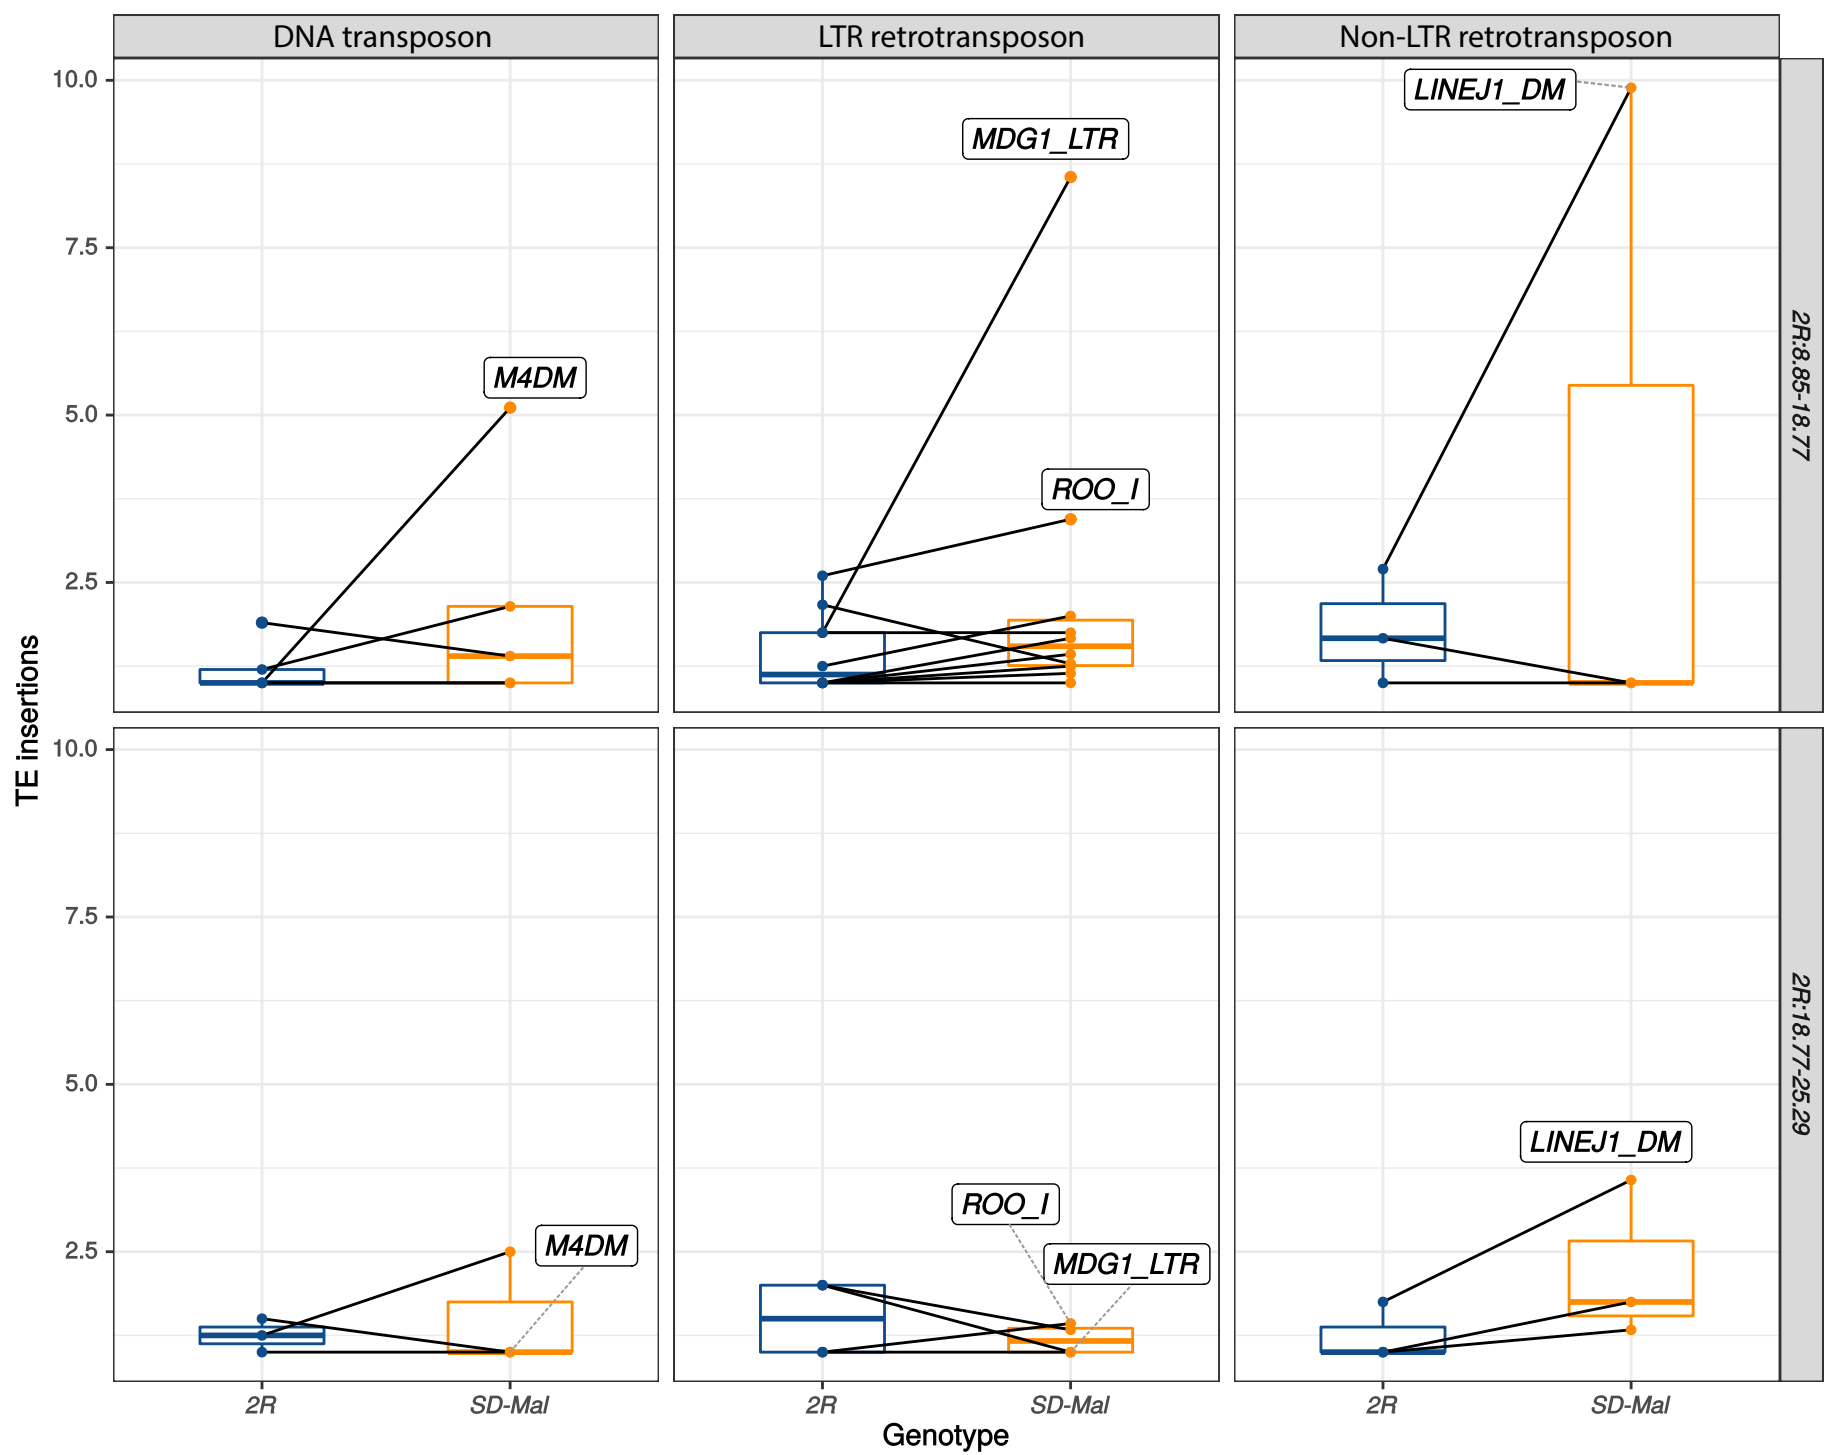

Supplement: supp [file elife-78981-supp-v1.zip]

2L

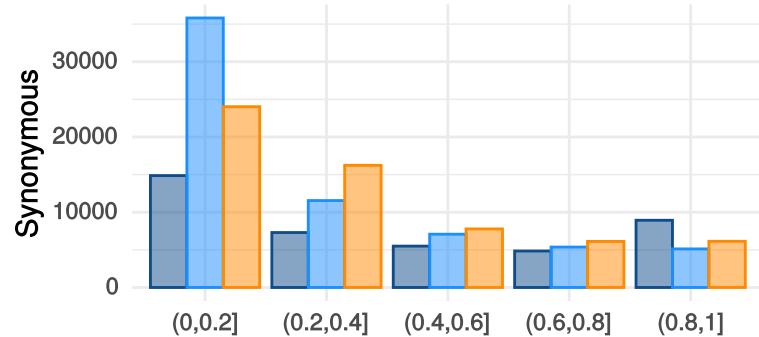

2R

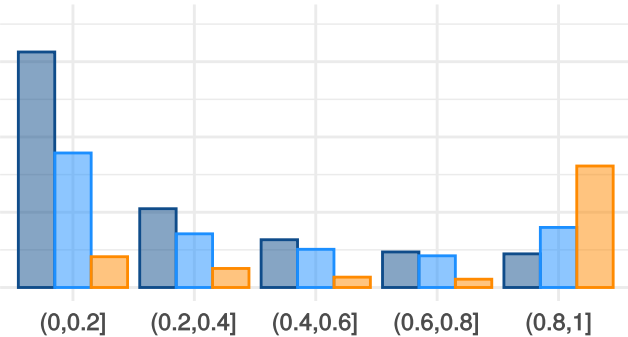

Non-synonymous

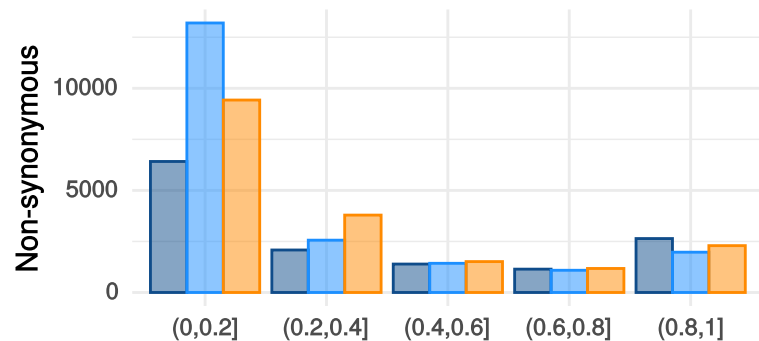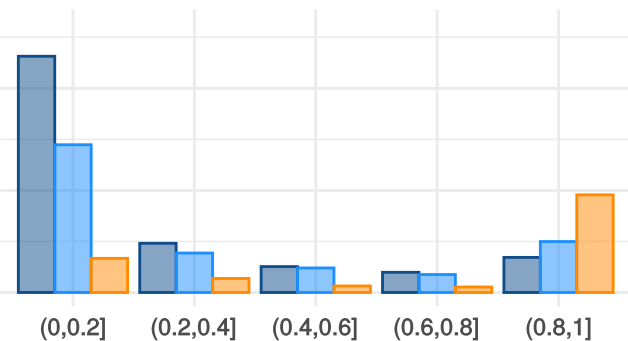

N/S

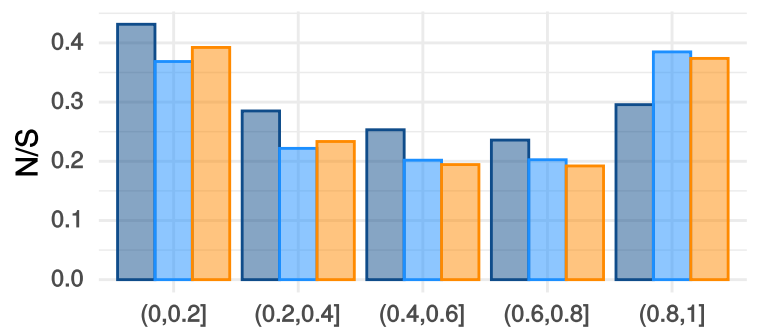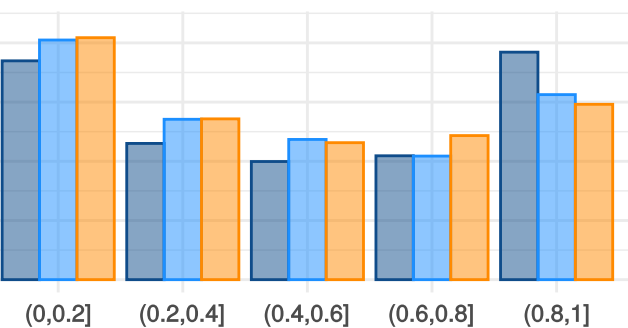

Frequency

$\ln(2L)t$   $\ln(2R)NS$   $SD-Mal$

Supplement: supp [file elife-78981-supp-v1.zip]

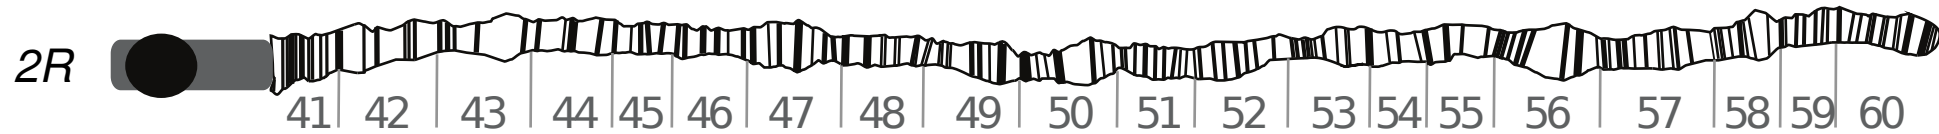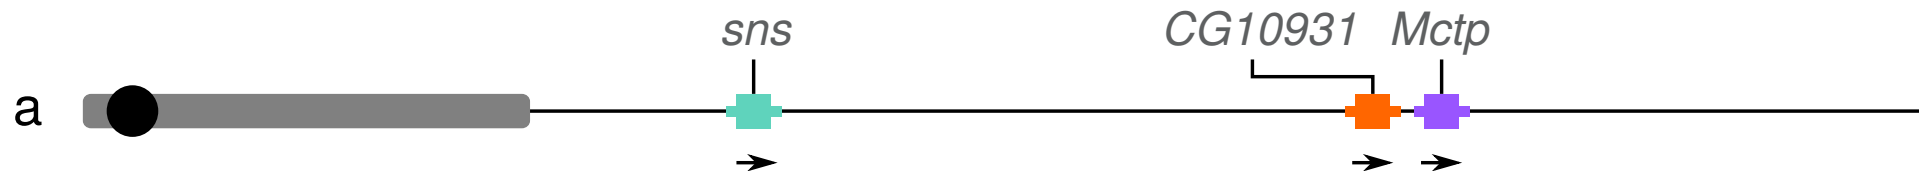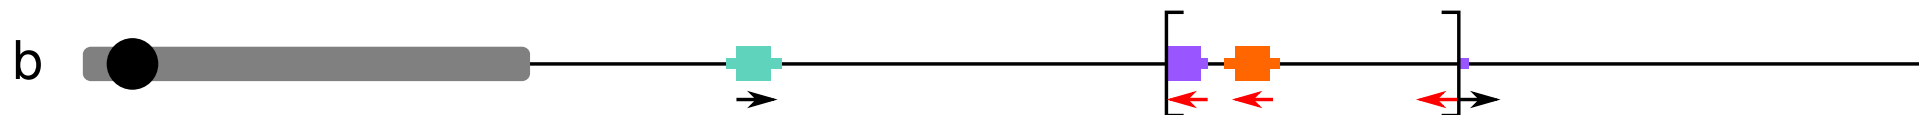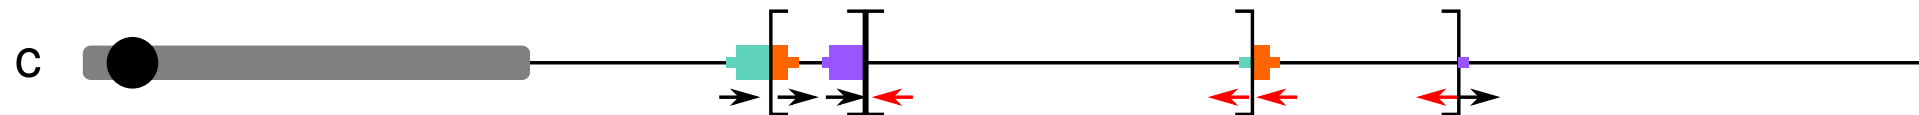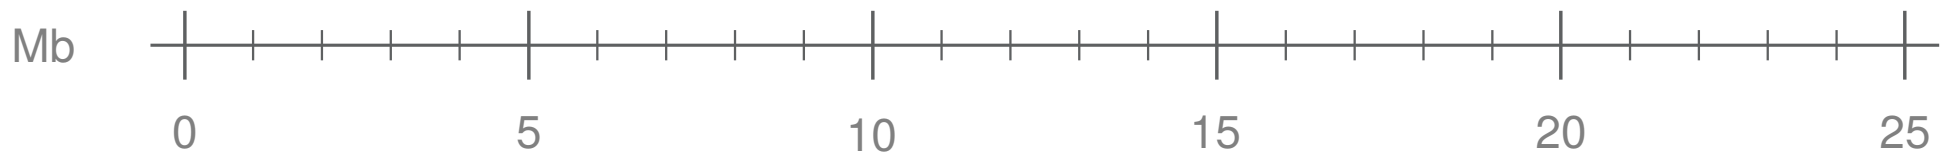

Supplement: supp [file elife-78981-supp-v1.zip]

**A**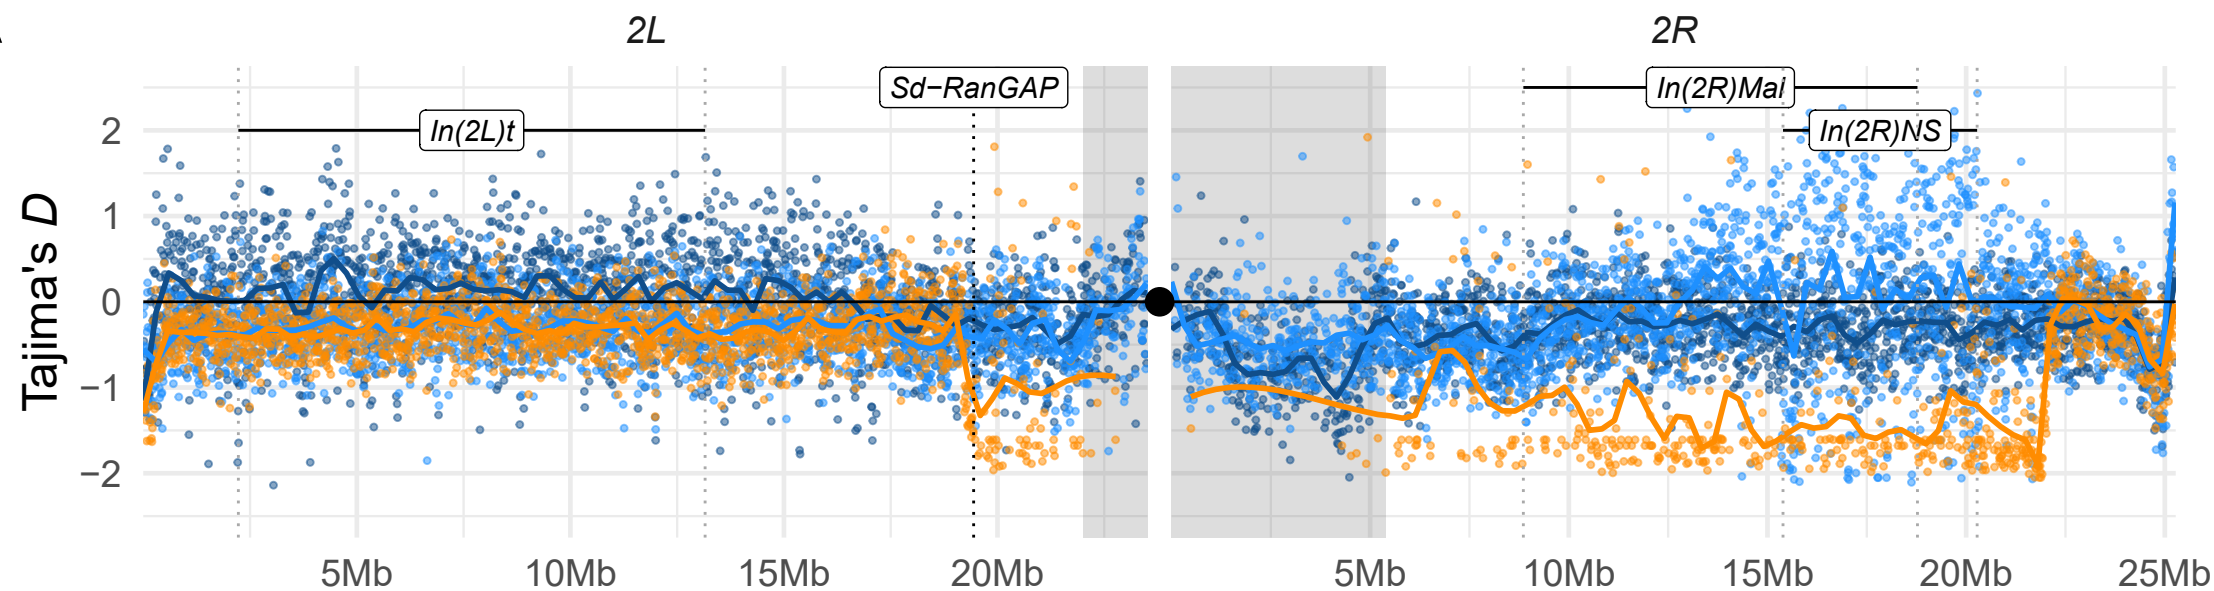**B**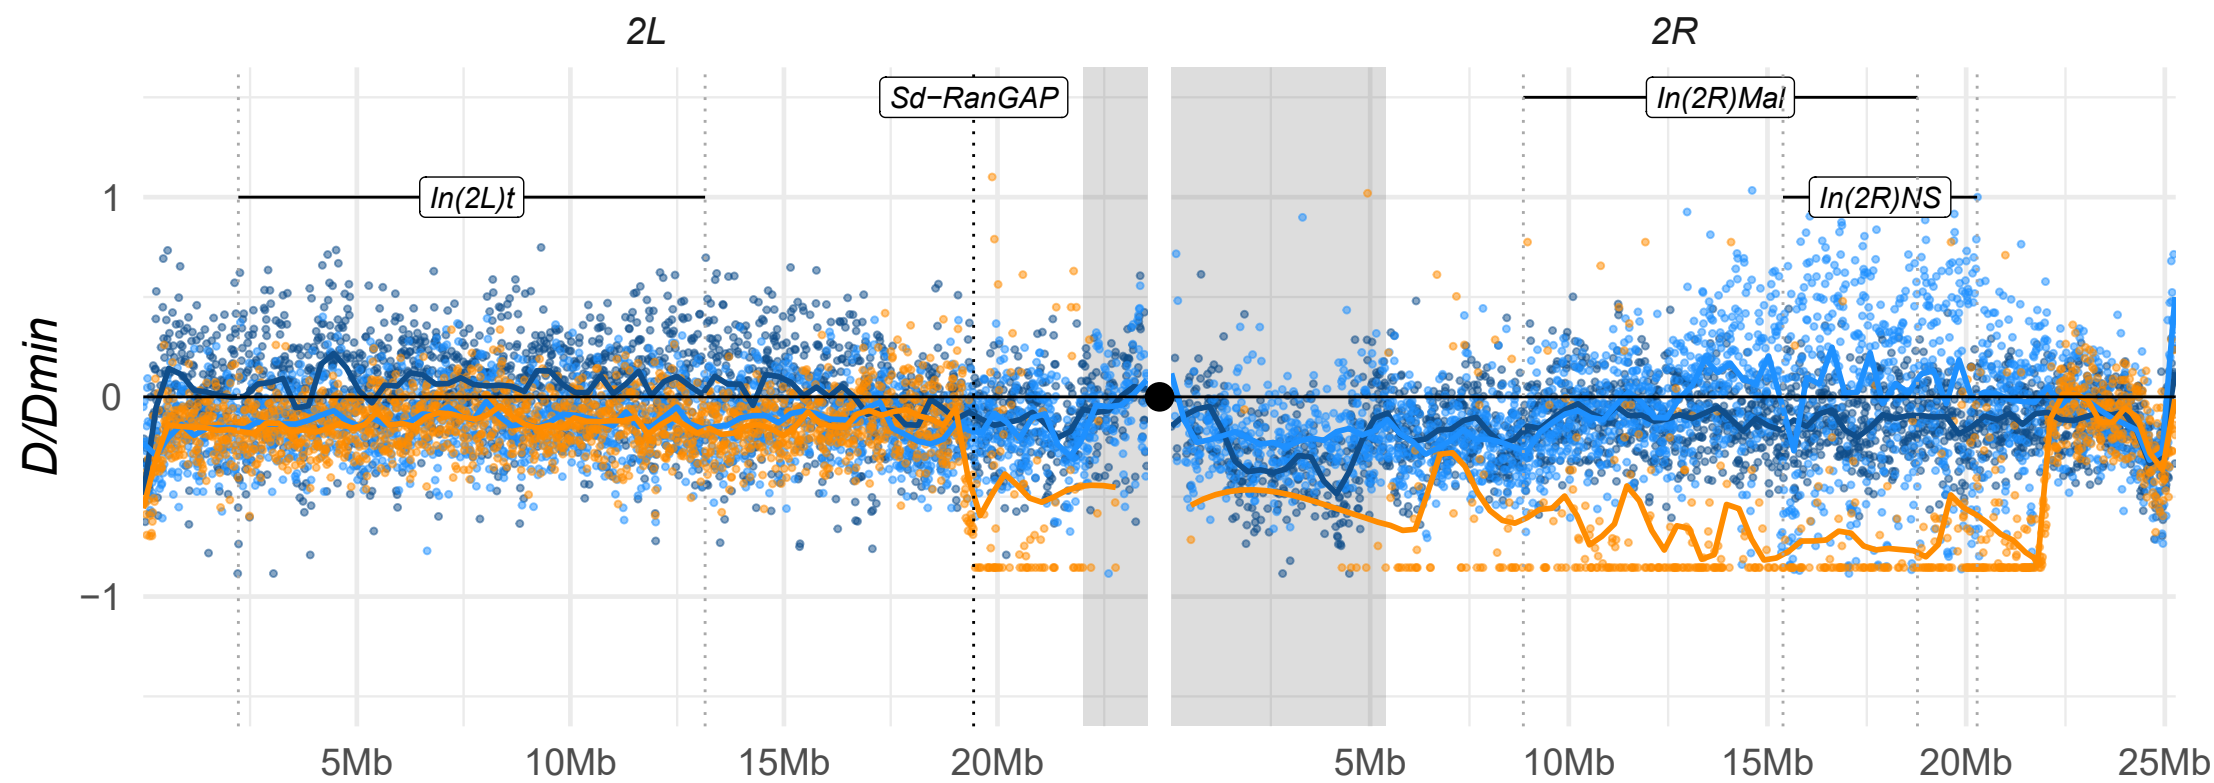

Genotype —  $In(2L)t$  —  $In(2R)NS$  —  $SD-Mal$

Supplement: supp [file elife-78981-supp-v1.zip]
